# Supplementary material for: Enhanced hemato-endothelial specification during human embryonic differentiation through developmental cooperation between AF4-MLL and MLL-AF4 fusions
Source: PubMed Central journal article supplement — Haematologica. 2019 Jan 24;104(6):1189–201. doi: 10.3324/haematol.2018.202044 (PMC6545840; doi:10.3324/haematol.2018.202044), 2019-06
Supplement: 2018.202044_BUENO_SUPPL.pdf [file 2018.202044_BUENO_SUPPL.pdf]

## Enhanced hemato-endothelial specification during human embryonic differentiation through developmental cooperation between *AF4-MLL* and *MLL-AF4* fusions

Clara Bueno,<sup>1,2</sup> Fernando J Calero-Nieto,<sup>3</sup> Xiaonan Wang,<sup>3</sup> Rafael Valdés-Mas,<sup>4</sup> Francisco Gutiérrez-Agüera,<sup>1</sup> Heleia Roca-Ho,<sup>1</sup> Veronica Ayllon,<sup>5</sup> Pedro J Real,<sup>5</sup> David Arambilet,<sup>6</sup> Lluís Espinosa,<sup>6,2</sup> Raul Torres-Ruiz,<sup>1</sup> Antonio Agraz-Doblas,<sup>1,7</sup> Ignacio Varela,<sup>7</sup> Jasper de Boer,<sup>8</sup> Anna Bigas,<sup>6,2</sup> Bertie Gottgens,<sup>3</sup> Rolf Marschalek<sup>9</sup> and Pablo Menendez<sup>1,2,10</sup>

<sup>1</sup>Josep Carreras Leukemia Research Institute and Department of Biomedicine, School of Medicine, University of Barcelona, Spain; <sup>2</sup>Centro de Investigación Biomédica en Red de Cáncer (CIBER-ONC), ISCIII, Barcelona, Spain; <sup>3</sup>Department of Hematology, Cambridge Institute for Medical Research and Wellcome Trust-Medical Research Council Cambridge Stem Cell Institute, University of Cambridge, UK; <sup>4</sup>Dreamgenics S.L. Oviedo, Spain; <sup>5</sup>GENyO, Centre for Genomics and Oncological Research, Pfizer/University of Granada/Andalusian Regional Government and University of Granada, Department of Biochemistry and Molecular Biology, Granada, Spain; <sup>6</sup>Programa de Cáncer, Instituto Hospital del Mar de Investigaciones Médicas, Barcelona, Spain; <sup>7</sup>Instituto de Biomedicina y Biotecnología de Cantabria (CSIC-UC-Sodercan), Departamento de Biología Molecular, Universidad de Cantabria, Santander, Spain; <sup>8</sup>Cancer Section, UCL Great Ormond Street Institute of Child Health, London, UK; <sup>9</sup>Institute of Pharmaceutical Biology, Goethe-University, Frankfurt, Germany and <sup>10</sup>Institució Catalana de Recerca i Estudis Avançats (ICREA), Barcelona, Spain

©2019 Ferrata Storti Foundation. This is an open-access paper. doi:10.3324/haematol.2018.202044

Received: July 18, 2018.

Accepted: January 21, 2019.

Pre-published: January 24, 2019.

Correspondence: CLARA BUENO - cbueno@carrerasresearch.org

PABLO MENENDEZ - pmenendez@carrerasresearch.org

---

## Bueno C *et al.* Figure S1

A

AF4-MLL (8739 bp)

Red: AF4 exon 1-3

Blue: MLL exon 10 to 36

ATG :Start Codon

TAA :Stop Codon

ATGGCAGCCCAGTCAAGTTTGTACAATGACGACAGAAACCTGCTTCGAATTAGAGAGAAGGAA  
AGACGCAACCAGGAAGCCCACCAAGAGAAAGAGGCATTTCTGAAAAGATTCCCCTTTTTGGA  
GAGCCCTACAAGACAGCAAAAGGTGATGAGCTGTCTAGTCGAATACAGAACATGTTGGGAAAC  
TACGAAGAAGTGAAGGAGTTCCTTAGTACTAAGTCTCACACTCATCGCTGGATGCTTCTGAAA  
ATAGGTTGGGAAAGCCGAAATATCCTTTAATTCCTGACAAAGGGAGCAGCATTCCATCCAGCT  
CCTTCCACACTAGTGTCCACCACCAGTCCATTACACTCCTGCGTCTGGACCACTTTCTGTTGG  
CAACATTAGCCACAATCCAAAGATGGCGCAGCCAAGAAGTGAACCAATGCCAAGTCTCCATGC  
CAAAGCTGCGGCCACCGGACAGCCAGCACCTGACCCAGGATCGCCTTGGTCAGGAGGGG  
TTCGGCTCTAGTCATCACAAGAAAGGTGACCGAAGAGCTGACGGAGACCACTGTGCTTCGGT  
GACAGATTTCGGCTCCAGAGAGGGAGCTTTCTCCCTTAATCTCTTTGCCTTCCCCAGTTCCCC  
TTTGTACCTATACATTCCAACCAGCAAACCTTTCCCCGGACGCAAGGAAGCAGCAAGGTTCA  
TGGCAGCAGCAATAACAGTAAAGGCTATTGCCAGCCAAATCTCCAAGGACCTAGCAGTGAA  
AGTCCATGATAAAGAGACCCCTCAAGACAGTTTGGTGGCCCCTGCCAGCCGCCTTCTCAGAC  
ATTTCCACCTCCCTCCCTCCCTCAAAAAGTGTGCAATGCAGCAGAAGCCCACGGCTTATGT  
CCGGCCCATGGATGGTCAAGATCAGGCCCTAGTGAATCCCCTGAACTGAAACCACTGCCGG  
AGGACTATCGACAGCAGACCTTTGAAAAACAGACTTGAAAGTGCCTGCCAAAGCCAAGCTCA  
CCAAACTGAAGATGCCTTCTCAGTCAGTTGAGGAGGATTGTGAAGCAGAAAATGTGTGGGAGA  
TGGGAGGCTTAGGAATCTTGACTTCTGTTTCTATAACACCCAGGGTGGTTTGTCTTCTGTGC  
CAGTAGTGGGCATGTAGAGTTTGTGTATTGCCAAGTCTGTTGTGAGCCCTTCCACAAGTTTTGT  
TTAGAGGAGAACGAGCGCCCTCTGGAGGACCAGCTGGAAAATTGGTGTGTCGTCGTTGCAA  
ATTCTGTACGTTTTGTGGAAGGCAACATCAGGCTACAAAGCAGCTGCTGGAGTGTAATAAGTG  
CCGAAACAGCTATCACCTGAGTGCCTGGGACCAAACCTACCCACCAAACCCACAAAGAAGAA  
GAAAGTCTGGATCTGTACCAAGTGTGTTTCGCTGTAAGAGCTGTGGATCCACAACCTCAGGCAA  
AGGGTGGGATGCACAGTGGTCTCATGATTTCTCACTGTGTCATGATTGCGCCAAGCTCTTTC  
TAAAGGAAACTTCTGCCCTCTCTGTGACAAATGTTATGATGATGATGACTATGAGAGTAAGATG  
ATGCAATGTGGAAAGTGTGATCGCTGGGTCCATTCCAAATGTGAGAATCTTTCAGGTACAGAA  
GATGAGATGTATGAGATTCTATCTAATCTGCCAGAAAGTGTGGCCTACACTTGTGTGAACTGTA  
CTGAGCGGCACCCTGCAGAGTGGCGACTGGCCCTTGAAAAAGAGCTGCAGATTTCTCTGAAG  
CAAGTTCTGACAGCTTTGTTGAATTCTCGGACTACCAGCCATTTGCTACGCTACCGGCAGGCT  
GCCAAGCCTCCAGACTTAAATCCCGAGACAGAGGAGAGTATACCTTCCCGCAGCTCCCCGA  
AGGACCTGATCCACCAGTTCCTACTGAGGTGAGCAAACAGGATGATCAGCAGCCTTTAGATCT  
AGAAGGAGTCAAGAGGAAGATGGACCAAGGGAATTACACATCTGTGTTGGAGTTCAGTGATGA  
TATTGTGAAGATCATTCAAGCAGCCATTAATTCAGATGGAGGACAGCCAGAAATTAAGGAGCC  
AACAGCATGGTCAAGTCCCTTCTTTCATTCCGGCAAATGGAACGTGTTTTTCCATGGTTCAGTGTA  
AAAAGTCCAGGTTTTGGGAGCCAAATAAAGTATCAAGCAACAGTGGGATGTTACCAAACGCAG  
TGCTTCCACCTTCACTTGACCATAATTATGCTCAGTGGCAGGAGCGAGAGGAAAACAGCCACA  
CTGAGCAGCCTCCTTAATGAAGAAAATCATTCCAGCTCCCAAACCCAAAGGTCTGGAGAAC  
CAGACTACCAAACCTCTCTGCATCCTCTACACCACCAATTTTGGAGTACTGATAGGAGTCGAGA  
AGACAGTCCAGAGCTGAACCCACCCCCAGGCATAGAAGACAATAGACAGTGTGCGTTATGTTT  
GACTTATGGTGTGACAGTGCTAATGATGCTGGTTCGTTTACTATATATTGGCCAAAATGAGTGG

ACACATGTA AATTGTGCTTTGTGGTCAGCGGAAGTGTTTGAAGATGATGACGGATCACTAAAGA  
ATGTGCATATGGCTGTGATCAGGGGCAAGCAGCTGAGATGTGAATTCTGCCAAAAGCCAGGA  
GCCACCGTGGGTTGCTGTCTCACATCCTGCACCAGCAACTATCACTTCATGTGTTCCCGAGCC  
AAGAAGTGTGCTTTCTGGATGATAAAAAAGTATATTGCCAACGACATCGGGATTTGATCAAAG  
GCGAAGTGGTTCCTGAGAATGGATTTGAAGTTTTGAGAAGAGTGTGGACTTTGAAGGAAT  
CAGCTTGAGAAGGAAGTTTCTCAATGGCTTGAACCAGAAAATATCCACATGATGATTGGGTCT  
ATGACAATCGACTGCTTAGGAATTCTAATGATCTCTCCGACTGTGAAGATAAGCTCTTTCCTAT  
TGGATATCAGTGTTCAGGGTATACTGGAGCACCACAGATGCTCGCAAGCGCTGTGTATATAC  
ATGCAAGATAGTGGAGTGCCGTCTCCAGTCGTAGAGCCGGATATCAACAGCACTGTTGAACA  
TGATGAAAACAGGACCATTGCCCATAGTCCAACATCTTTTACAGAAAAGTTCATCAAAGAGAGT  
CAAACACAGCTGAAATTATAAGTCCTCCATCACCAGACCGACCTCCTCATTACAAAACCTCTG  
GCTCCTGTTATTATCATGTCATCTCAAAGGTCCCGAGATTGCAACACCCAGTTATTCTCCAAC  
ACAGAGATCCCCTGGCTGTGACCGTTGCCTTCTGCAGGAAGTCCTACCCCAACCACTCATGA  
AATAGTCACAGTAGGTGATCCTTTACTCTCCTCTGGACTTCGAAGCATTGGCTCCAGGCGTCA  
CAGTACCTCTTCCTTATCACCCCAGCGGTCCAAACTCCGGATAATGTCTCCAATGAGAAGTGG  
GAATACTTACTCTAGGAATAATGTTTCTCAGTCTCCACCACCGGGACCGCTACTGATCTTGAA  
TCAAGTGCCAAAGTAGTTGATCATGTCTTAGGGCCACTGAATCAAGTACTAGTTTAGGGCAA  
ACACTTCCACCTCTTCAAATTTGCAAAGGACAGTGGTTACTGTAGGCAATAAAAACAGTCACTT  
GGATGGATCTTCATCTCAGAAATGAAGCAGTCCAGTGCCTCAGACTTGGTGTCCAAGAGCTC  
CTCTTTAAAGGGAGAGAAGACCAAAGTGTGAGTTCCAAGAGCTCAGAGGGATCTGCACATAA  
TGTGGCTTACCCTGGAATTCCTAAACTGGCCCCACAGGTTCAACACAACATCTAGAGAAGTGA  
AATGTTAGTAAAATCGGCTCCTTTGCTGAACCCTCTTCAGTGTGTTTTCTTCTAAAGAGGCC  
TCTCCTTCCCACACCTCCATTTGAGAGGGCAAAGGAATGATCGAGACCAACACACAGATTCTA  
CCCAATCAGCAAACCTCCTCCTCAGATGAAGATACTGAAGTCAAACCTTGAAGCTATCTGGAAT  
GAGCAACAGATCATCCATTATCAACGAACATATGGGATCTAGTTCAGAGATAGGAGACAGAA  
AGGGAAAAAATCCTGTAAAGAAAATTTCAAAGAAAAGCATTCCAGTAAATCTTTTTTGAACCTG  
GTCAGGTGACAACCTGGTGAGGAAGGAAACTTGAAGCCAGAGTTTATGGATGAGGTTTTGACTC  
CTGAGTATATGGGCCAACGACCATGTAACAATGTTTCTTCTGATAAGATTGGTGATAAAGGCC  
TTCTATGCCAGGAGTCCCCAAAGCTCCACCATGCAAGTAGAAGGATCTGCCAAGGAATTACA  
GGCACCACGGAAACGCACAGTCAAAGTGACACTGACACCTCTAAAAATGGAAAATGAGAGTCA  
ATCCAAAAATGCCCTGAAAGAAAAGTAGTCTGCTTCCCCTTTGCAAATAGAGTCAACATCTCCC  
ACAGAACCAATTTAGCCTCTGAAAATCCAGGAGATGGTCCAGTGGCCCAACCAAGCCCCAAT  
AATACCTCATGCCAGGATTCTCAAAGTAACAACATATCAGAATCTTCCAGTACAGGACAGAAACC  
TAATGCTTCCAGATGGCCCCAAACCTCAGGAGGATGGCTCTTTTAAAGGAGGTATCCCCGTC  
GCAGTGGCCGTGCACGTTCTAACATGTTTTTTGGGCTTACCCCACTCTATGGAGTAAGATCCTA  
TGGTGAAGAAGACATTCCATTCTACAGCAGCTCAACTGGGAAGAAGCGAGGCAAGAGATCAGC  
TGAAGGACAGGTGGATGGGGCCGATGACTTAAGCACTTCCAGATGAAGACGACTTATACTATTA  
CAACTTCACTAGAACAGTGATTTCTCAGGTGGAGAGGAACGACTGGCATCCATAATTTATTT  
CGGGAGGAGGAACAGTGTGATCTTCAAAAAATCTCACAGTTGGATGGTGTGATGATGGGACA  
GAGAGTGATACTAGTGTACAGCCACAACAAGGAAAAGCAGCCAGATTCCAAAAAGAAATGGT  
AAAGAAAATGGAACAGAGAACTTAAAGATTGATAGACCTGAAGATGCTGGGGAGAAAGAACAT  
GTCATAAGAGTTCTGTTGGCCACAAAAATGAGCCAAAGATGGATAACTGCCATTCTGTAAGCA  
GAGTTAAAACACAGGGACAAGATTCTTGAAGCTCAGCTCAGCTCATTGGAGTCAAGCCGCA  
GAGTCCACACAAGTACCCCTCCGACAAAAATTTACTGGACACCTATAATACTGAGCTCCTGAA  
ATCAGATTCAGACAATAACAACAGTGTGACTGTGGGAATATCCTGCCTTCCAGACATTATGGAC  
TTTGTACTAAAGAATACTCCATCCATGCAGGCTTTGGGTGAGAGCCCAGAGTCATCTTCATCAG  
AACTCCTGAATCTTGGTGAAGGATTGGGTCTTGACAGTAATCGTGA AAAAGACATGGGTCTTTT  
TGAAGTATTTTCTCAGCAGCTGCCTACAACAGAACCTGTGGATAGTAGTGTCTCTTCTCTATC  
TCAGCAGAGGAACAGTTTGGATTGCCTCTAGAGCTACCATCTGATCTGTCTGTCTTGACCACC  
CGGAGTCCCCTGTCCCCAGCCAGAATCCCAGTAGACTAGCTGTTATCTCAGACTCAGGGGA  
GAAGAGAGTAACCATCACAGAAAAATCTGTAGCCTCCTCTGAAAGTGACCCAGCACTGCTGAG  
CCCAGGAGTAGATCCAACCTCTGAAGGCCACATGACTCCTGATCATTTTATCCAAGGACACAT

GGATGCAGACCACATCTCTAGCCCTCCTTGTGGTTCAGTAGAGCAAGGTCATGGCAACAATCA  
GGATTTAACTAGGAACAGTAGCACCCCTGGCCTTCAGGTACCTGTTTCCCCAACTGTTCCCAT  
CCAGAACCAGAAGTATGTGCCCAATTCTACTGATAGTCCTGGCCCGTCTCAGATTTCCAATGCA  
GCTGTCCAGACCACTCCACCCACCTGAAGCCAGCCACTGAGAACTCATAGTTGTTAACCAG  
AACATGCAGCCACTTTATGTTCTCCAACTCTTCCAAATGGAGTGACCCAAAAAATCCAATTGA  
CCTCTTCTGTTAGTTCTACACCCAGTGTGATGGAGACAAATACTTCAGTATTGGGACCCATGGG  
AGGTGGTCTCACCCTTACCACAGGACTAAATCCAAGCTTGCCAACCTTCTCAATCTTTGTTCCCT  
TCTGCTAGCAAAGGATTGCTACCCATGTCTCATCACCCAGCACTTACATTCCCTCCCTGCAGCTA  
CTCAAAGTAGTTTCCCACCAAACATCAGCAATCCTCCTTCAGGCCTGCTTATTGGGGTTCAGCC  
TCCTCCGGATCCCCAACTTTTGGTTTTCAGAATCCAGCCAGAGGACAGACCTCAGTACCACAGT  
AGCCACTCCATCCTCTGGACTCAAGAAAAGACCCATATCTCGTCTACAGACCCGAAAGAATAAA  
AACTTGCTCCCTCTAGTACCCCTTCAAACATTGCCCTTCTGATGTGGTTTCTAATATGACATT  
GATTAACCTTCACACCCTCCCAGCTTCCCTAATCATCCAAGTCTGTTAGATTTGGGGTCACTTAATA  
CTTCATCTCACCGAACTGTCCCCAACATCATAAAAAGATCTAAATCTAGCATCATGTATTTTGAA  
CCGGCACCCCTGTTACCACAGAGTGTGGGAGGAACTGCTGCCACAGCGGCAGGCACATCAAC  
AATAAGCCAGGATACTAGCCACCTCACATCAGGGTCTGTGTCTGGCTTGGCATCCAGTTCCTC  
TGTCTTGAATGTTGTATCCATGCAAACCTACCACAACCCCTACAAGTAGTGCGTCAGTTCAGGA  
CACGTACCTTAACCAACCCAAGGTTGCTTGGTACCCAGATATTGGCTCAATAAGCAATCTTT  
TAATCAAAGCTAGCCAGCAGAGCCTGGGGATTACAGGACCAGCCTGTGGCTTTACCGCCAAGTT  
CAGGAATGTTTCCACAACCTGGGGACATCACAGACCCCTCTACTGCTGCAATAACAGCGGCAT  
CTAGCATCTGTGTGCTCCCTCCACTCAGACTACGGGCATAACAGCCGCTTACCTTCTGGGG  
AAGCAGACGAACACTATCAGCTTCAGCATGTGAACCAGCTCCTTGCCAGCAAACTGGGATTC  
ATTCTTCCCAGCGTGATCTTGATTCTGCTTCAGGGCCCCAGGTATCCAACCTTACCCAGACGGT  
AGACGCTCCTAATAGCATGGGACTGGAGCAGAACAAGGCTTTATCCTCAGCTGTGCAAGCCAG  
CCCCACCTCTCCTGGGGTCTCCATCCTCTCCATCTTCTGGACAGCGGTGAGCAAGCCCTTC  
AGTGCCGGGTCCCACTAAACCCAAACCAAAAACCAAACGGTTTTAGCTGCCTCTAGACAAAGG  
GAATGGCAAGAAGCACAATGTTTCCCATTTGCGGACCAGTTCTTCTGAAGCACACATTCCAGA  
CCAAGAAACGACATCCCTGACCTCAGGCACAGGGACTCCAGGAGCAGAGGCTGAGCAGCAG  
GATACAGCTAGCGTGGAGCAGTCTCCAGAAAGGAGTGTGGGCAACCTGCAGGGCAAGTCGC  
TGTTCTTCCGGAAGTTCAGGTGACCCAAAATCCAGCAAATGAACAAGAAAGTGCAGAACCTAA  
AACAGTGAAGAAGAGGAAAGTAATTTACAGCTCCCACTGATGCTTTGGCTTCAGCAAGAACA  
AAAGCGGAAGGAAAGCATTACTGAGAAAAAACCAAGAAAGGACTTGTTTTTGAATTTCCAGT  
GATGATGGCTTTAGATCTGTGCAGAAAGTATTGAAGATGCCTGGAAGTCATTGACAGATAAAG  
TCCAGGAAGCTCGATCAAATGCCCGCCTAAAGCAGCTCTCATTTGCAGGTGTTAACGGTTTGA  
GGATGCTGGGGATTCTCCATGATGCAGTTGTGTTCCCTCATTGAGCAGCTGTCTGGTGCCAAGC  
ACTGTCGAAATTACAAATTCGTTTTCCACAAGCCAGAGGAGGCAATGAACCCCTTGAACC  
CTCACGGCTCAGCCAGGGCTGAAGTCCACCTCAGGAAGTCAGCATTTGACATGTTAACTTCC  
TGGCTTCTAAACATCGTCAGCCTCCTGAATACAACCCCAATGATGAAGAAGAGGAGGAGGTAC  
AGCTGAAGTCAGCTCGGAGGGCAACTAGCATGGATCTGCCAATGCCATGCGCTTCCGGCAC  
TTAAAAAAGACTTCTAAGGAGGCAGTTGGTGTCTACAGGTCTCCCATCCATGGCCGGGGTCTT  
TTCTGTAAGAGAAACATTGATGCAGGTGAGATGGTATTGAGTATGCCGGCAACGTCATCCGC  
TCCATCCAGACTGACAAGCGGGAAAAGTATTACGACAGCAAGGGCATTGGTTGCTATATGTTCC  
CGAATTGATGACTCAGAGGTAGTGGATGCCACCATGCATGGAAATGCTGCACGCTTCATCAAT  
CACTCGTGTGAGCCTAACTGCTATTCTCGGGTCATCAATATTGATGGGCAGAAGCACATTGTCA  
TCTTTGCCATGCGTAAGATCTACCGAGGAGAGGAACTCACTTACGACTATAAGTTCCCATTGA  
GGATGCCAGCAACAAGCTGCCCTGCAACTGTGGCGCTAAGAAATGCCGGAAGTTCCTAAAC

A

**B**

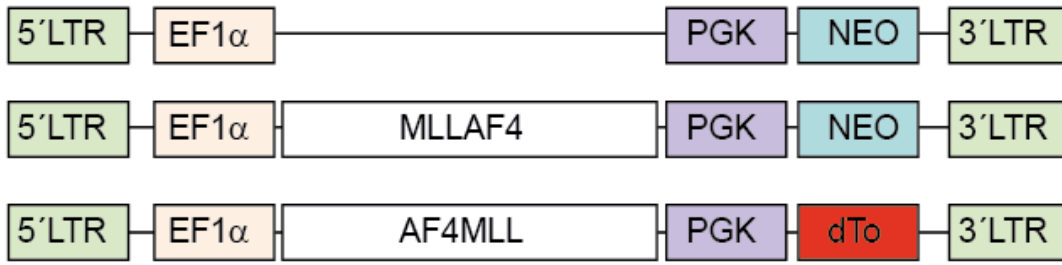

**A**

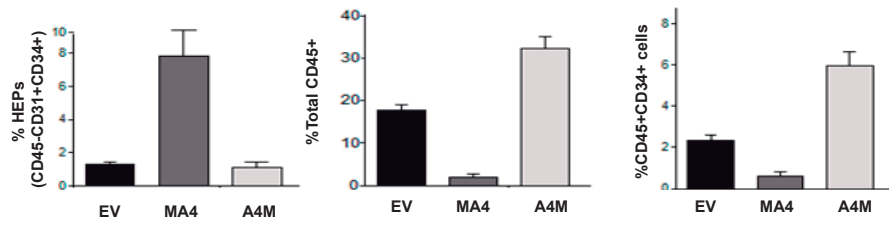

**B**

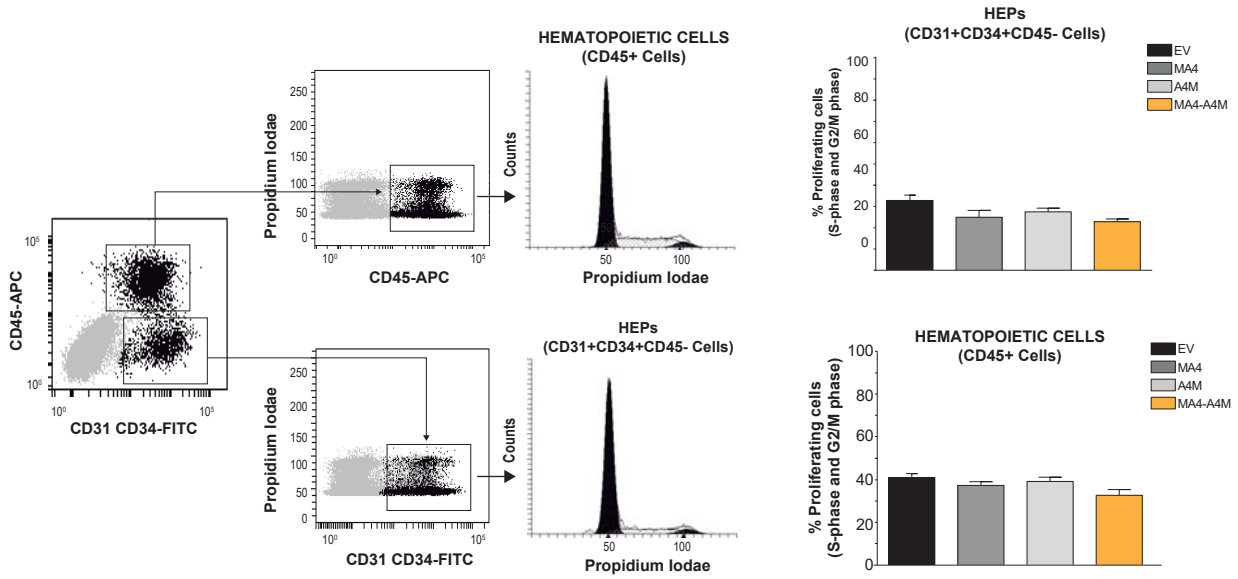

**C**

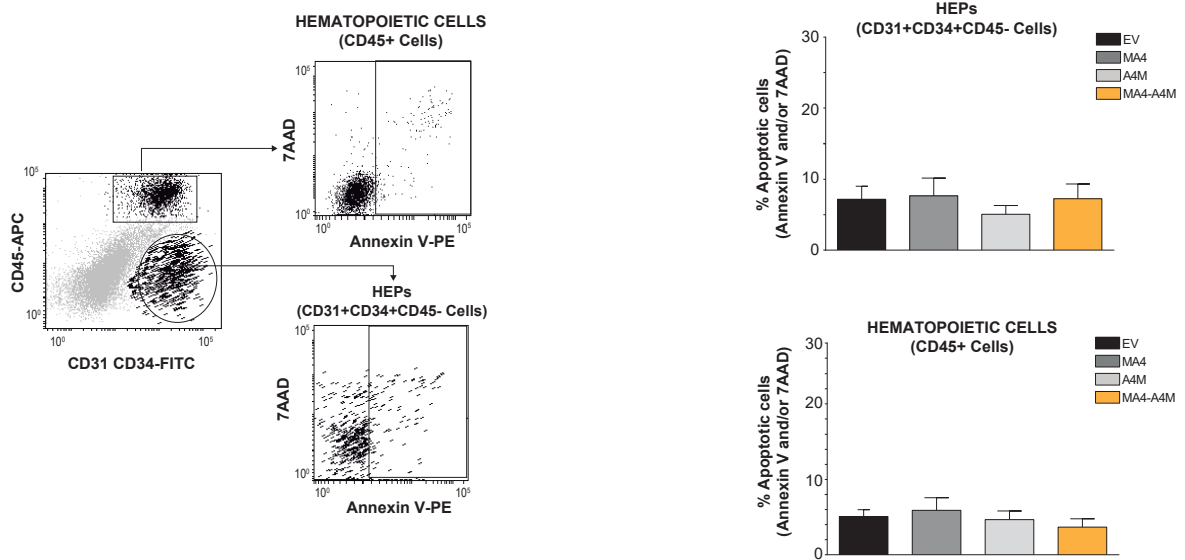

**A**

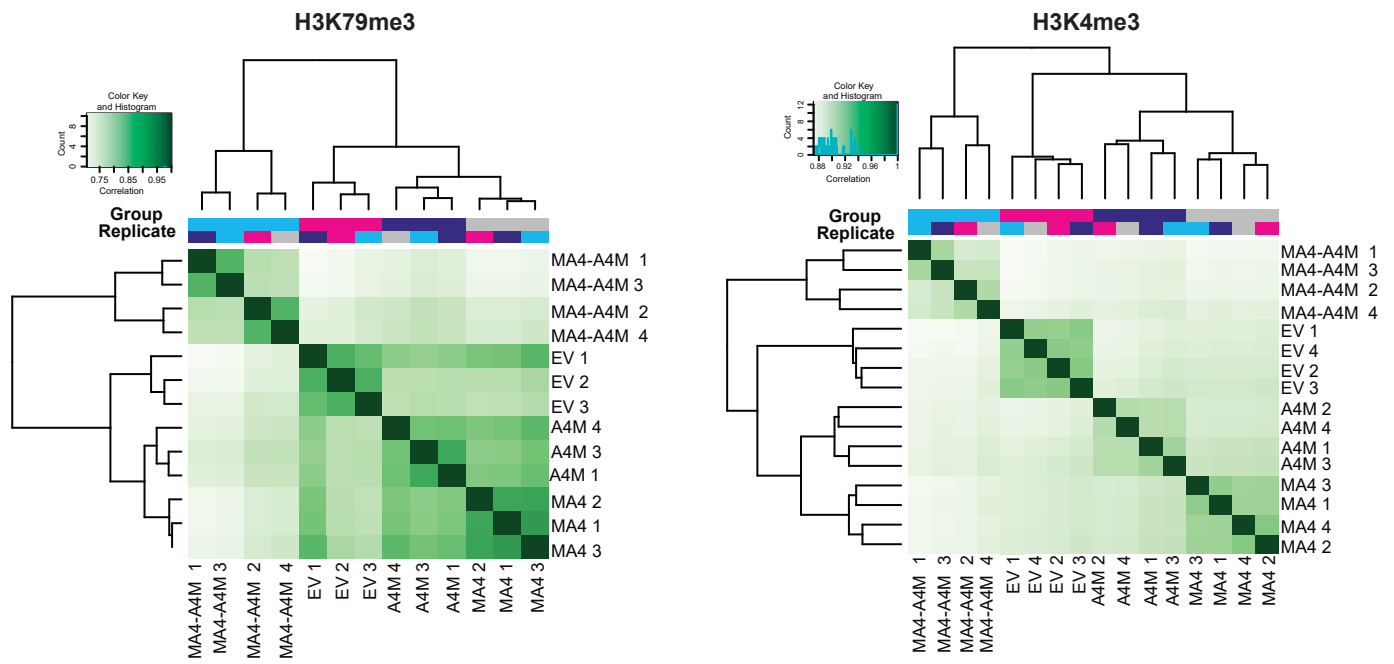

**B**

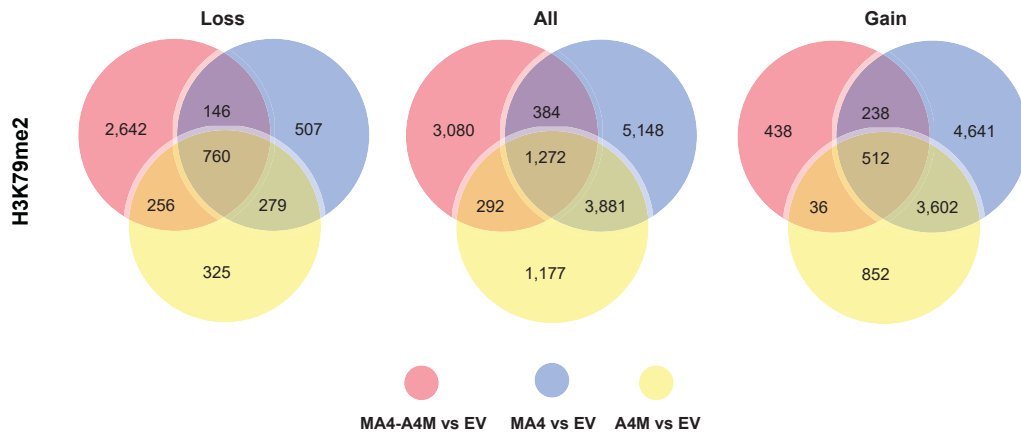

**C**

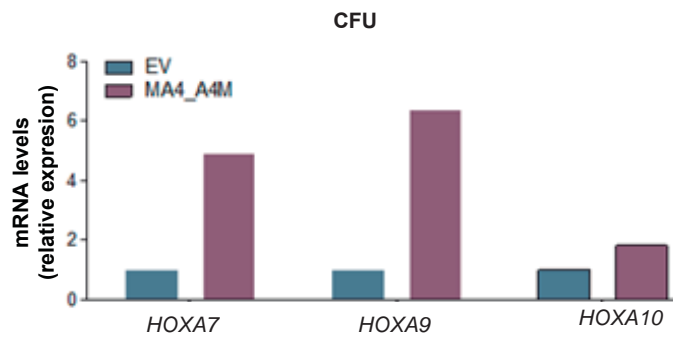

A

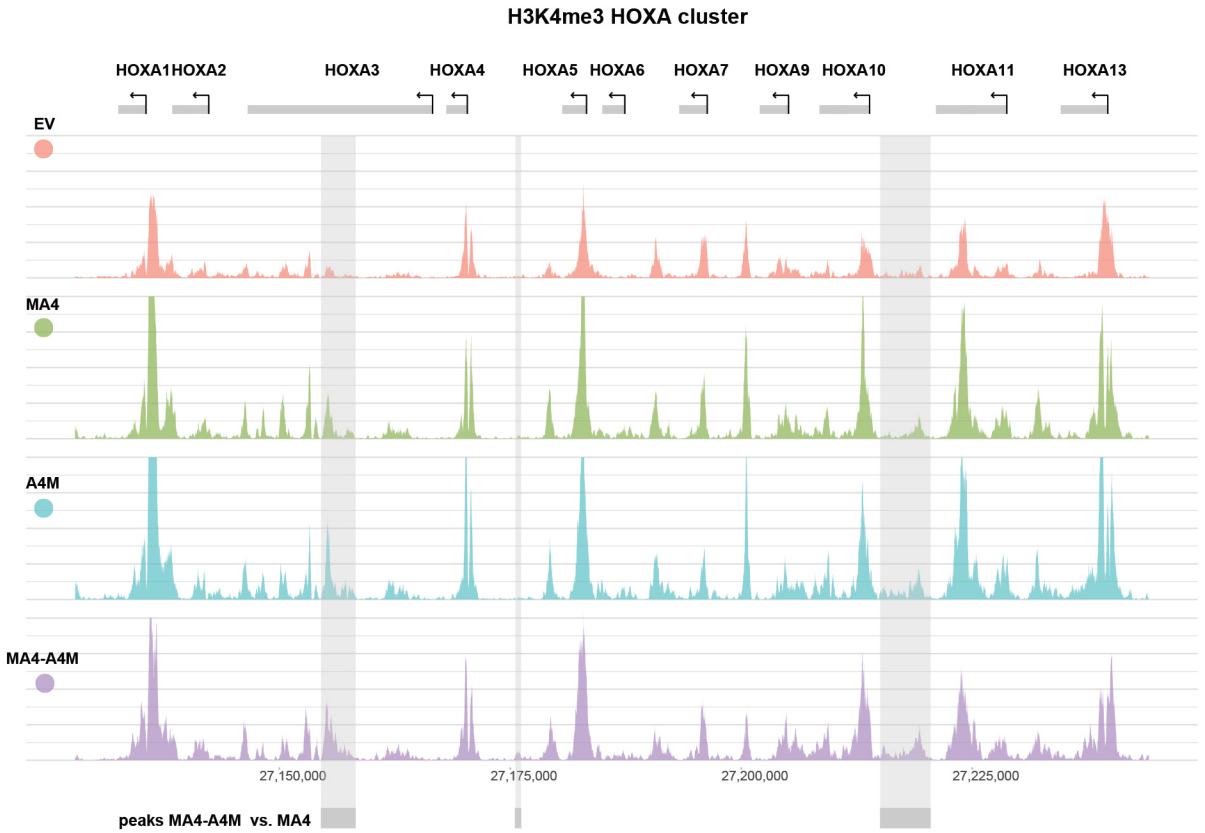

B

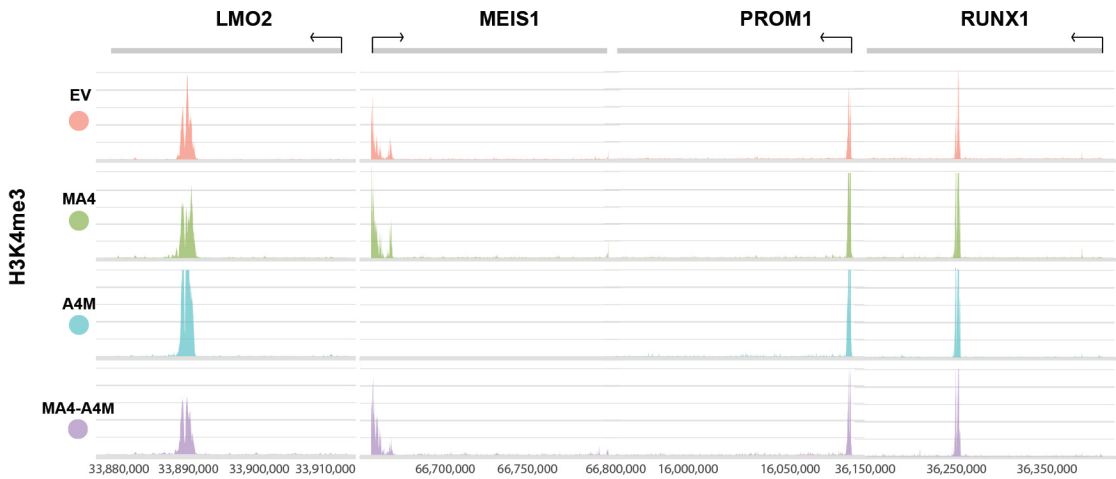



## **SUPPLEMENTARY LEGENDS AND METHODS**

### **Chromatin immunoprecipitation Sequencing**

One million day 15 hematopoietic differentiating hEB-derived cells were subjected to Chromatin Immunoprecipitation (ChIP) as described <sup>1</sup>. Briefly, formaldehyde crosslinked cell extracts were sonicated using a Bioruptor (Diagenode) with a 0.5-min interval protocol to obtain DNA fragments of 200–500 bp. The chromatin fraction was divided into three parts and incubated overnight with 2 µg of anti-H3K4me3, anti-H3K79me3, or anti-H3 antibodies (Abcam) in RIPA buffer, and precipitated with protein A/G-Sepharose (Amersham). Cross-linkage of the co-precipitated DNA-protein complexes was reversed, and the DNA was sequenced at the CRG-CNAG Genomics Facility. Paired-end 50 bp ChIP-seq data reads were generated using a HiSeq 2500 Illumina sequencer. Alignment and peak detection was performed using the ENCODE (phase-3) histone ChIP-seq pipeline specifications. Reads were aligned to the human reference genome (assembly hg19) using BWA<sup>2</sup>, removing all reads with a quality score <30. Peaks were called using MACS2<sup>3</sup> and whole cell extract samples as background samples. Differential analysis of histone mark peaks between experimental groups and the EV control group was performed using DiffBind<sup>4</sup>, with a False Discovery Rate (FDR) cut-off of 0.1. Peaks annotation and Gene Ontology (GO) enrichment were analyzed with ChIP-Enrich package in R<sup>4</sup>, using an FDR threshold of 0.1. ChIP-Seq data is deposited and available at Gene Expression Omnibus (GEO, accession number GSE111263).

### **Low-input RNA-seq and bulk RNA-seq on t(4;11)+B-ALL patients**

For low-input RNAseq, 50 HEPs were FACS-purified from day 15 EBs into individual wells of a 96-well PCR plate containing lysis buffer (0.2% Triton-X100 and 2.3 U of SUPERase-In RNase Inhibitor; Ambion). Three independent replicates (50 cells/replicate) per condition were analyzed. RNA/cDNA was obtained and amplified as per the SMARTSEQ2 protocol<sup>5,6</sup>. Libraries were prepared for

sequencing using the Illumina Nextera XT DNA preparation kit. RNA-seq data was generated using a 50 single-end sequencing protocol. Pooled libraries were sequenced on the Illumina HiSeq 4000 platform. Reads were mapped to the human genome (Ensembl 81) and the ERCC sequences using STAR (version 2.4.2a) with default parameters. HTseq-count<sup>7</sup> was used to count the number of reads mapped to each gene with -s no (non-strand specific mode). Data were normalized for sequencing depth using the size factor from the DESeq2 package (version 1.12.2)<sup>8</sup>. Low-input RNA-seq data is deposited and available at GEO (GSE118947).

Bulk RNA-seq data on t(4;11)+ B-ALL patients was generated on the Illumina HiSeq 2500 platform using a 76 paired-end sequencing protocol and aligned to the human reference genome (hg19) using Tophat<sup>19</sup>. A gene was considered differentially expressed in MA4-A4M+ HEPs when it was >2-fold regulated ( $p < 0.01$ ) compared with the equivalent gene in EV-HEPs. Analysis of functional categories and biofunctions was performed with the genes differentially expressed using Ingenuity Pathway Analysis software (Ingenuity Inc., Redwood City, CA). Potential read pairs supporting the expression of MA4 and A4M fusion transcripts in patient samples were identified manually and with in-house written scripts as pairs in which each read aligned unambiguously to a different gene and which were compatible with the genomic breakpoints that were determined at the DNA level in all the samples. Additionally, RT-PCR with primers corresponding to *AF4* exon3 and *MLL* exon 12 (exons contained in all predicted fusions) was performed in all the samples to confirm the expression of any potential isoform of the reciprocal fusion gene. The identity of the isoform was confirmed by capillary sequencing. Finally, the expression of each fusion gene was determined by qRT-PCR using primer pairs spanning the breakpoint between genes. RNA-seq data is deposited and available at GEO (accession number GSE111263).

## SUPPLEMENTARY REFERENCES

1. Guiu J, Bergen DJ, De Pater E, et al. Identification of *Cdca7* as a novel Notch transcriptional target involved in hematopoietic stem cell emergence. *J Exp Med*. 2014;211(12):2411-2423.
2. Li H, Durbin R. Fast and accurate short read alignment with Burrows-Wheeler transform. *Bioinformatics*. 2009;25(14):1754-1760.
3. Zhang Y, Liu T, Meyer CA, et al. Model-based analysis of ChIP-Seq (MACS). *Genome Biol*. 2008;9(9):R137.
4. Welch RP, Lee C, Imbriano PM, et al. ChIP-Enrich: gene set enrichment testing for ChIP-seq data. *Nucleic Acids Res*. 2014;42(13):e105.
5. Picelli S, Bjorklund AK, Faridani OR, Sagasser S, Winberg G, Sandberg R. Smart-seq2 for sensitive full-length transcriptome profiling in single cells. *Nat Methods*. 2013;10(11):1096-1098.
6. Picelli S, Faridani OR, Bjorklund AK, Winberg G, Sagasser S, Sandberg R. Full-length RNA-seq from single cells using Smart-seq2. *Nat Protoc*. 2014;9(1):171-181.
7. Anders S, Pyl PT, Huber W. HTSeq--a Python framework to work with high-throughput sequencing data. *Bioinformatics*. 2015;31(2):166-169.
8. Love MI, Huber W, Anders S. Moderated estimation of fold change and dispersion for RNA-seq data with DESeq2. *Genome Biol*. 2014;15(12):550.

## SUPPLEMENTARY LEGENDS

**Figure S1. Coding sequence of the A4M fusion used in this study.** (A) The full-length cDNA was sequenced-verified. Fusion breakpoint is located in AF4 exon 2 and MLL exon 10. (B) Schematic of lentivectors used in this study.

**Figure S2. Co-expression of MA4 and A4M promotes specification rather than survival/proliferation of HEPs.** (A) Day 20 MA4-expressing hEBs display a significant higher HEP production coupled to an impaired blood (CD45<sup>+</sup> and CD45<sup>+</sup>CD34<sup>+</sup>) formation. (B) *Left*, representative FACS analysis of the identification of HEPs and CD45<sup>+</sup> hematopoietic cells and their cell-cycle distribution. *Right*, frequency of proliferating (S+G<sub>2</sub>M phases) CD45<sup>+</sup> blood cells and HEPs. (C) *Left*, representative FACS analysis of apoptotic CD45<sup>+</sup> hematopoietic cells and HEPs. *Right*, frequency of apoptotic (Annexin V<sup>+</sup>) HEPs and CD45<sup>+</sup> hematopoietic cells for the indicated genotypes.

**Figure S3. H3K79me3 ChIP-seq profiles for the different genotypes.** (A) Correlation heatmap for both H3K79me3 and H3K4me3 using affinity scores based on read counts in consensus peaks distinguishes between the four experimental groups. (B) Venn diagrams depicting the number of differentially enriched genomic regions for H3K79me3 between experimental groups relative to EV. (C) Quantitative expression of the indicated *HOX-A* genes in CFUs from day 15 EV- and double-fusion-expressing HEPs.

**Figure S4. H3K4me2 profiles at genomic loci of MLL targets identified by Guenther *et al.*** Representative profiles for ChIP-seq using an anti-H3K4me<sup>3</sup> antibody at genomic sites of HOX-A (A) and non-HOX (B) MLL targets in the indicated genotypes of human ESC-differentiating derivatives.

**Table S1: Primers used in this study for RT-PCR.**

|                   |                          |
|-------------------|--------------------------|
| <i>GAPDH FW</i>   | GCACCGTCAAGGCTGAGAAC     |
| <i>GAPDH RV</i>   | AGGGATCTCGCTCCTGGAA      |
| <i>OCT4 FW</i>    | GGGTTTTTGGGATTAAGTTCTTCA |
| <i>OCT4 RV</i>    | GCCCCACCCTTTGTGTT        |
| <i>NANOG FW</i>   | ACAACGGCCGAAGAATAGCA     |
| <i>NANOG RV</i>   | GGTCCCAGTCGGGTTTAC       |
| <i>SOX2 FW</i>    | CAAAAATGGCCATGCAGGTT     |
| <i>SOX2 RV</i>    | AGTTGGGATCGAACAAAAGCTATT |
| <i>DNMT3B FW</i>  | GCTCACAGGGCCCGATACTT     |
| <i>DNMT3B RV</i>  | GCAGTCCTGCAGCTCGAGTTTA   |
| <i>CRIP1 FW</i>   | CGGAAGTGTGAGCACGATGT     |
| <i>CRIP1 RV</i>   | GGGCAGCCAGGTGTCATG       |
| <i>MLL-AF4 Fw</i> | CAGGTCCAGAGCAGAGCAAAC    |
| <i>MLL-AF4 Rv</i> | GAGCACTTGGAGGTGCAGATG    |
| <i>AF4-MLL Fw</i> | GTTGCAATGCAGCAGAAGCC     |
| <i>AF4-MLL Rv</i> | CAGGGTGATAGCTGTTTCGG     |

## Downregulated

Table S2: Genes differentially expressed in double fusion-expressing as compared to control (EV) I

|                 | geneID        | baseMean    | log2FoldChange | lfcSE    | stat     |
|-----------------|---------------|-------------|----------------|----------|----------|
| ENSG00000112319 | EYA4          | 119,7812612 | -7,044862129   | 0,498747 | -14,1251 |
| ENSG00000197956 | S100A6        | 74,70274938 | -4,207670299   | 0,362337 | -11,6126 |
| ENSG00000159176 | CSRP1         | 189,5093971 | -4,448754354   | 0,433169 | -10,2703 |
| ENSG00000171735 | CAMTA1        | 620,0966312 | -2,63097972    | 0,26318  | -9,99688 |
| ENSG00000129595 | EPB41L4A      | 143,8337732 | -3,620551338   | 0,367992 | -9,83866 |
| ENSG00000121691 | CAT           | 36,73876494 | -4,619144396   | 0,469468 | -9,83911 |
| ENSG00000166770 | ZNF667-AS1    | 26,47276123 | -4,671600613   | 0,476384 | -9,80638 |
| ENSG00000053438 | NNAT          | 16,76487505 | -3,757812712   | 0,456726 | -8,22772 |
| ENSG00000166575 | TMEM135       | 450,180446  | -3,324034043   | 0,415462 | -8,00081 |
| ENSG00000257870 | RP11-616L12.1 | 21,50131485 | -4,406254358   | 0,581565 | -7,57654 |
| ENSG00000214872 | SMTNL1        | 29,19194545 | -4,020118702   | 0,547389 | -7,34417 |
| ENSG00000126947 | ARMCX1        | 19,10444916 | -3,661220371   | 0,518724 | -7,05813 |
| ENSG00000251379 | RP11-484O2.1  | 11,01878906 | -4,051707545   | 0,578618 | -7,00239 |
| ENSG00000158716 | DUSP23        | 23,54803256 | -3,475578813   | 0,520465 | -6,67784 |
| ENSG00000100644 | HIF1A         | 792,004365  | -2,324741527   | 0,349887 | -6,64426 |
| ENSG00000122966 | CIT           | 309,5111002 | -2,978040214   | 0,467302 | -6,37283 |
| ENSG00000145681 | HAPLN1        | 1168,660196 | -2,488794725   | 0,394148 | -6,31436 |
| ENSG00000123307 | NEUROD4       | 14,76503349 | -3,711665311   | 0,603199 | -6,1533  |
| ENSG00000151962 | RBM46         | 8,6172188   | -3,652100592   | 0,593965 | -6,14868 |
| ENSG00000164619 | BMPER         | 82,57948722 | -3,051493964   | 0,497697 | -6,13122 |
| ENSG00000100290 | BIK           | 43,70310088 | -3,317822269   | 0,541896 | -6,12261 |
| ENSG00000050555 | LAMC3         | 20,06173885 | -3,21721061    | 0,531609 | -6,05184 |
| ENSG00000167555 | ZNF528        | 15,96797568 | -3,401966116   | 0,57936  | -5,87194 |
| ENSG00000149179 | C11orf49      | 373,9107859 | -2,410856438   | 0,411459 | -5,85929 |
| ENSG00000137871 | ZNF280D       | 37,3536919  | -2,381859852   | 0,415608 | -5,73103 |
| ENSG00000165118 | C9orf64       | 8,084483374 | -3,283794749   | 0,596166 | -5,50819 |
| ENSG00000162654 | GBP4          | 82,52014498 | -2,47923141    | 0,458077 | -5,41226 |
| ENSG00000076716 | GPC4          | 7,134763765 | -3,24223284    | 0,608348 | -5,32957 |
| ENSG00000171476 | HOPX          | 162,0285124 | -2,521224355   | 0,474735 | -5,3108  |
| ENSG00000245680 | ZNF585B       | 6,288623057 | -3,047314734   | 0,578532 | -5,26732 |
| ENSG00000249252 | RP11-665G4.1  | 10,94518525 | -2,963291554   | 0,582687 | -5,08556 |
| ENSG00000142748 | FCN3          | 240,9954012 | -2,670085804   | 0,531573 | -5,02299 |
| ENSG00000143614 | GATAD2B       | 90,16811689 | -2,123176462   | 0,42897  | -4,94947 |
| ENSG00000185507 | IRF7          | 11,90717047 | -2,442768243   | 0,493898 | -4,9459  |
| ENSG00000134817 | APLNR         | 237,009581  | -2,180931226   | 0,442427 | -4,92947 |
| ENSG00000125170 | DOK4          | 69,15447671 | -1,872722463   | 0,380282 | -4,92456 |
| ENSG00000138315 | OIT3          | 123,6956759 | -2,82171733    | 0,579118 | -4,87244 |
| ENSG00000125775 | SDCBP2        | 9,950851737 | -2,868043853   | 0,589784 | -4,86288 |
| ENSG00000126709 | IFI6          | 157,1396901 | -2,135200905   | 0,44302  | -4,81965 |
| ENSG00000137942 | FNBP1L        | 238,2318442 | -1,143914856   | 0,240099 | -4,76435 |
| ENSG00000176728 | TTY14         | 7,465857067 | -2,871826685   | 0,606999 | -4,73119 |
| ENSG00000118515 | SGK1          | 94,59572992 | -2,551626347   | 0,541541 | -4,71178 |
| ENSG00000108798 | ABI3          | 32,92496542 | -2,143701535   | 0,456145 | -4,6996  |
| ENSG00000008283 | CYB561        | 12,17136654 | -2,271524984   | 0,486907 | -4,66522 |
| ENSG00000188778 | ADRB3         | 8,60506653  | -2,566915557   | 0,554624 | -4,62821 |
| ENSG00000266472 | MRPS21        | 256,7992655 | -1,032266153   | 0,224316 | -4,60184 |
| ENSG00000253929 | CASC21        | 10,99630532 | -2,865101044   | 0,622643 | -4,60151 |
| ENSG00000113790 | EHHADH        | 6,601260431 | -2,771625162   | 0,620618 | -4,46591 |
| ENSG00000225792 | AC004540.4    | 33,51932827 | -2,490684309   | 0,564859 | -4,40939 |
| ENSG00000253438 | PCAT1         | 26,94528599 | -2,547965544   | 0,579052 | -4,40024 |
| ENSG00000095015 | MAP3K1        | 44,49573983 | -1,601596875   | 0,366684 | -4,36778 |
| ENSG00000280079 | CTC-260E6.4   | 4,201191271 | -2,612039681   | 0,613045 | -4,26077 |
| ENSG00000089050 | RBBP9         | 18,85931665 | -2,239301793   | 0,528577 | -4,23647 |

## Downregulated

|                 |             |             |              |          |          |
|-----------------|-------------|-------------|--------------|----------|----------|
| ENSG00000109501 | WFS1        | 11,45922699 | -2,297305349 | 0,545604 | -4,21057 |
| ENSG00000105750 | ZNF85       | 35,18030151 | -2,03086483  | 0,485118 | -4,18633 |
| ENSG00000188643 | S100A16     | 658,5606704 | -1,602025271 | 0,386902 | -4,14065 |
| ENSG00000050628 | PTGER3      | 22,15704024 | -2,396796376 | 0,57973  | -4,13433 |
| ENSG00000113209 | PCDHB5      | 4,603009559 | -2,561413963 | 0,622412 | -4,1153  |
| ENSG00000169255 | B3GALNT1    | 6,456259068 | -2,420174153 | 0,5913   | -4,09297 |
| ENSG00000138835 | RGS3        | 134,7621143 | -1,343148381 | 0,328301 | -4,09121 |
| ENSG00000115461 | IGFBP5      | 43,88760757 | -2,456376257 | 0,607117 | -4,04597 |
| ENSG00000167941 | SOST        | 55,5937508  | -2,329603289 | 0,582511 | -3,99924 |
| ENSG00000128602 | SMO         | 4,201100881 | -2,331501814 | 0,589037 | -3,95816 |
| ENSG00000184220 | CMSS1       | 99,07782163 | -1,184435761 | 0,299615 | -3,95319 |
| ENSG00000196814 | MVB12B      | 18,6907974  | -2,36958793  | 0,600272 | -3,94753 |
| ENSG00000165259 | HDX         | 3,752930822 | -2,416387304 | 0,615296 | -3,92719 |
| ENSG00000137216 | TMEM63B     | 40,97473872 | -2,191833358 | 0,557964 | -3,92827 |
| ENSG00000166482 | MFAP4       | 33,74531096 | -2,36800861  | 0,604369 | -3,91815 |
| ENSG00000100888 | CHD8        | 120,5148935 | -1,370548703 | 0,35098  | -3,90492 |
| ENSG00000198785 | GRIN3A      | 5,057809271 | -2,433961659 | 0,624515 | -3,89736 |
| ENSG00000128040 | SPINK2      | 17,31695007 | -2,409310609 | 0,62118  | -3,8786  |
| ENSG00000184344 | GDF3        | 47,03429759 | -1,608254011 | 0,414806 | -3,87713 |
| ENSG00000172269 | DPAGT1      | 91,17134944 | -0,973958418 | 0,252828 | -3,85225 |
| ENSG00000103978 | TMEM87A     | 77,09366437 | -0,930827779 | 0,242655 | -3,83602 |
| ENSG00000197859 | ADAMTSL2    | 3,993914273 | -2,377353556 | 0,6191   | -3,84001 |
| ENSG00000157152 | SYN2        | 9,446479206 | -2,307034408 | 0,601271 | -3,83693 |
| ENSG00000180543 | TSPYL5      | 3,622665339 | -2,329868038 | 0,609108 | -3,82505 |
| ENSG00000132622 | HSPA12B     | 7,527287149 | -2,359294514 | 0,618173 | -3,81656 |
| ENSG00000154783 | FGD5        | 64,4228883  | -1,548935262 | 0,406995 | -3,80578 |
| ENSG00000221923 | ZNF880      | 9,214690052 | -2,304807456 | 0,609095 | -3,78399 |
| ENSG00000267383 | CTC-260E6.6 | 3,883965663 | -2,232586548 | 0,592887 | -3,76562 |
| ENSG00000120708 | TGFBI       | 91,70684239 | -2,076734506 | 0,551285 | -3,76708 |
| ENSG00000278318 | ZNF229      | 6,000326955 | -2,312454347 | 0,614696 | -3,76195 |
| ENSG00000182853 | VMO1        | 5,507887137 | -2,345260449 | 0,625084 | -3,75191 |
| ENSG00000109099 | PMP22       | 191,524615  | -1,714779803 | 0,458    | -3,74406 |
| ENSG00000143621 | ILF2        | 779,2962781 | -0,763125525 | 0,20397  | -3,74137 |
| ENSG00000156535 | CD109       | 92,89720586 | -1,532077411 | 0,413633 | -3,70395 |
| ENSG00000164053 | ATRIP       | 11,14423421 | -1,996586023 | 0,539181 | -3,703   |
| ENSG00000269834 | ZNF528-AS1  | 5,822155471 | -2,246975187 | 0,607714 | -3,69742 |
| ENSG00000136869 | TLR4        | 36,50193073 | -1,968054924 | 0,534075 | -3,68498 |
| ENSG00000133636 | NTS         | 263,7477271 | -1,851710654 | 0,505231 | -3,66508 |
| ENSG00000183072 | NKX2-5      | 7,504153845 | -2,287599283 | 0,624984 | -3,66025 |
| ENSG00000171227 | TMEM37      | 64,20801532 | -1,828344024 | 0,501254 | -3,64754 |
| ENSG00000118523 | CTGF        | 23,79760678 | -2,05484338  | 0,564356 | -3,64104 |
| ENSG00000143878 | RHOB        | 123,0762709 | -1,165082318 | 0,320141 | -3,63927 |
| ENSG00000228065 | LINC01515   | 9,063863586 | -2,161801995 | 0,594472 | -3,6365  |
| ENSG00000105825 | TFPI2       | 148,9275203 | -2,004539393 | 0,555907 | -3,60589 |
| ENSG00000198046 | ZNF667      | 4,673953372 | -2,203789836 | 0,612935 | -3,59547 |
| ENSG00000128463 | EMC4        | 243,526124  | -1,020257843 | 0,284652 | -3,58422 |
| ENSG00000129219 | PLD2        | 20,75205268 | -1,844978284 | 0,515983 | -3,57566 |
| ENSG00000198155 | ZNF876P     | 21,53321141 | -1,858631803 | 0,520801 | -3,56879 |
| ENSG00000154864 | PIEZO2      | 10,72154092 | -2,04403594  | 0,574046 | -3,56075 |
| ENSG00000188167 | TMPPE       | 8,499811893 | -2,171684721 | 0,610707 | -3,55602 |
| ENSG00000167085 | PHB         | 160,4917939 | -0,728482562 | 0,206203 | -3,53284 |
| ENSG00000079308 | TNS1        | 15,59828255 | -1,907912201 | 0,542247 | -3,51853 |
| ENSG00000173068 | BNC2        | 7,553218219 | -2,072085911 | 0,589584 | -3,51449 |
| ENSG00000140937 | CDH11       | 38,05932655 | -1,818437228 | 0,517773 | -3,51203 |
| ENSG00000214022 | REPIN1      | 16,34937523 | -1,45512511  | 0,4145   | -3,51055 |

## Downregulated

|                 |               |             |              |          |          |
|-----------------|---------------|-------------|--------------|----------|----------|
| ENSG00000145623 | OSMR          | 22,88032432 | -1,714715805 | 0,48917  | -3,50536 |
| ENSG00000134107 | BHLHE40       | 29,32775574 | -1,724282256 | 0,49275  | -3,49931 |
| ENSG00000137959 | IFI44L        | 24,12130347 | -2,143875186 | 0,618601 | -3,46569 |
| ENSG00000075336 | TIMM21        | 62,0256047  | -1,334155081 | 0,387092 | -3,44661 |
| ENSG00000075213 | SEMA3A        | 4,414059558 | -2,148672606 | 0,624614 | -3,44    |
| ENSG00000123411 | IKZF4         | 5,955377563 | -2,037072187 | 0,594437 | -3,42689 |
| ENSG00000187123 | LYPD6         | 11,07461616 | -2,026908881 | 0,593353 | -3,41602 |
| ENSG00000101955 | SRPX          | 28,49768115 | -1,900070277 | 0,559264 | -3,39745 |
| ENSG00000132718 | SYT11         | 7,459581183 | -2,085624327 | 0,614559 | -3,39369 |
| ENSG00000116871 | MAP7D1        | 63,43010166 | -1,164518143 | 0,344658 | -3,37876 |
| ENSG00000221914 | PPP2R2A       | 127,74934   | -1,213673571 | 0,359423 | -3,37673 |
| ENSG00000136111 | TBC1D4        | 91,02589998 | -1,505884231 | 0,447621 | -3,3642  |
| ENSG00000260589 | STAM-AS1      | 6,353032422 | -2,061083344 | 0,613598 | -3,35901 |
| ENSG00000104883 | PEX11G        | 3,473941597 | -2,041500351 | 0,608034 | -3,35755 |
| ENSG00000128656 | CHN1          | 22,22951211 | -1,754175298 | 0,524292 | -3,3458  |
| ENSG00000100804 | PSMB5         | 1009,211466 | -0,468827604 | 0,140839 | -3,32882 |
| ENSG00000143387 | CTSK          | 20,76828404 | -1,906330014 | 0,573337 | -3,32497 |
| ENSG00000161298 | ZNF382        | 15,38563794 | -1,959869444 | 0,590249 | -3,32041 |
| ENSG00000197879 | MYO1C         | 52,84678543 | -1,454858668 | 0,43873  | -3,31607 |
| ENSG00000088756 | ARHGAP28      | 115,6586262 | -1,596855186 | 0,481915 | -3,31356 |
| ENSG00000023734 | STRAP         | 462,0612498 | -0,747464329 | 0,22603  | -3,30693 |
| ENSG00000165507 | C10orf10      | 220,6959202 | -1,658443129 | 0,50289  | -3,29782 |
| ENSG00000075043 | KCNQ2         | 6,601271751 | -2,061423654 | 0,624991 | -3,29832 |
| ENSG00000112414 | ADGRG6        | 36,47477989 | -1,745878365 | 0,529655 | -3,29626 |
| ENSG00000077616 | NAALAD2       | 56,93366239 | -1,520442973 | 0,462829 | -3,28511 |
| ENSG00000075914 | EXOSC7        | 194,602295  | -0,783595705 | 0,239541 | -3,27124 |
| ENSG00000171206 | TRIM8         | 63,84318428 | -0,865536936 | 0,264592 | -3,27121 |
| ENSG00000118257 | NRP2          | 283,4681789 | -1,532317765 | 0,469263 | -3,26537 |
| ENSG00000143127 | ITGA10        | 10,03941541 | -1,785434325 | 0,547072 | -3,26362 |
| ENSG00000023697 | DERA          | 150,4101781 | -0,681082172 | 0,208571 | -3,26547 |
| ENSG00000118777 | ABCG2         | 3,843971196 | -2,022242023 | 0,623639 | -3,24265 |
| ENSG00000187608 | ISG15         | 184,3901201 | -1,394462458 | 0,429952 | -3,24329 |
| ENSG00000126458 | RRAS          | 57,58634609 | -1,451973482 | 0,448239 | -3,23928 |
| ENSG00000165449 | SLC16A9       | 16,46524127 | -1,890504921 | 0,585565 | -3,22851 |
| ENSG00000184602 | SNN           | 32,10538075 | -1,634277643 | 0,507691 | -3,21904 |
| ENSG00000127241 | MASP1         | 23,24454565 | -1,845003945 | 0,576404 | -3,20089 |
| ENSG00000149948 | HMGA2         | 90,72469841 | -1,52121514  | 0,475166 | -3,20144 |
| ENSG00000114021 | NIT2          | 84,62290275 | -1,153181957 | 0,360509 | -3,19876 |
| ENSG00000184384 | MAML2         | 14,57290268 | -1,826824148 | 0,572071 | -3,19335 |
| ENSG00000242616 | GNG10         | 6,482908148 | -1,554933346 | 0,488834 | -3,1809  |
| ENSG00000148677 | ANKRD1        | 4,28010366  | -1,970424552 | 0,622291 | -3,1664  |
| ENSG00000196549 | MME           | 3,945823194 | -1,974427338 | 0,625005 | -3,15906 |
| ENSG00000253983 | RP1-16A9.1    | 14,33422465 | -1,874651488 | 0,594221 | -3,15481 |
| ENSG00000148516 | ZEB1          | 70,75457064 | -1,201599666 | 0,380806 | -3,15541 |
| ENSG00000005448 | WDR54         | 242,8808433 | -0,998035849 | 0,316873 | -3,14964 |
| ENSG00000154174 | TOMM70A       | 68,10833425 | -1,029143057 | 0,326615 | -3,15094 |
| ENSG00000132256 | TRIM5         | 97,54230397 | -1,156660563 | 0,368004 | -3,14307 |
| ENSG00000101230 | ISM1          | 3,50609647  | -1,959429369 | 0,624987 | -3,13515 |
| ENSG00000237187 | NR2F1-AS1     | 2,905463012 | -1,955399501 | 0,624047 | -3,13342 |
| ENSG00000242193 | RP11-568K15.1 | 3,073799555 | -1,950988371 | 0,623719 | -3,12799 |
| ENSG00000130299 | GTPBP3        | 13,910181   | -1,466872176 | 0,471831 | -3,1089  |
| ENSG00000154451 | GBP5          | 9,678934476 | -1,802622749 | 0,579799 | -3,10905 |
| ENSG00000142065 | ZFP14         | 15,70823406 | -1,538362857 | 0,495279 | -3,10605 |
| ENSG00000108352 | RAPGEFL1      | 5,309428532 | -1,91989045  | 0,623119 | -3,0811  |
| ENSG00000196611 | MMP1          | 14,43198215 | -1,892234278 | 0,614911 | -3,07725 |



Downregulated

|                 |               |             |              |          |          |
|-----------------|---------------|-------------|--------------|----------|----------|
| ENSG00000136546 | SCN7A         | 7,310132654 | -1,9043461   | 0,619072 | -3,07613 |
| ENSG00000182983 | ZNF662        | 5,485208999 | -1,918878485 | 0,624159 | -3,07434 |
| ENSG00000155438 | NIFK          | 129,0123703 | -0,987586753 | 0,321598 | -3,07088 |
| ENSG00000254615 | RP11-395G23.3 | 15,42007794 | -1,887702828 | 0,614815 | -3,07036 |
| ENSG00000233056 | ERVH48-1      | 27,2291599  | -1,801462596 | 0,587193 | -3,06792 |
| ENSG00000074219 | TEAD2         | 29,84254346 | -1,248631404 | 0,408137 | -3,05934 |
| ENSG00000267152 | CTD-2528L19.6 | 4,012936355 | -1,884323661 | 0,617433 | -3,05187 |
| ENSG00000197479 | PCDHB11       | 3,421521002 | -1,894232329 | 0,621873 | -3,04601 |
| ENSG00000151746 | BICD1         | 67,26482608 | -0,959827076 | 0,314971 | -3,04736 |
| ENSG00000254202 | RP11-120I21.2 | 4,008818691 | -1,904714553 | 0,625006 | -3,04751 |
| ENSG00000100379 | KCTD17        | 5,170316551 | -1,851441418 | 0,608966 | -3,0403  |
| ENSG00000232282 | MTND1P32      | 5,013687738 | -1,787125704 | 0,588479 | -3,03686 |

## Downregulated

### human ESC-derived HEPs

| pvalue      | padj        |
|-------------|-------------|
| 2,65937E-45 | 3,67046E-41 |
| 3,55721E-31 | 2,45483E-27 |
| 9,59483E-25 | 4,41426E-21 |
| 1,57275E-23 | 5,42676E-20 |
| 7,67258E-23 | 1,76495E-19 |
| 7,63836E-23 | 1,76495E-19 |
| 1,05687E-22 | 2,08385E-19 |
| 1,90803E-16 | 3,29182E-13 |
| 1,23598E-15 | 1,89545E-12 |
| 3,54881E-14 | 4,89806E-11 |
| 2,07039E-13 | 2,59778E-10 |
| 1,68761E-12 | 1,94103E-09 |
| 2,51638E-12 | 2,67162E-09 |
| 2,42493E-11 | 2,39064E-08 |
| 3,04737E-11 | 2,80399E-08 |
| 1,85566E-10 | 1,42288E-07 |
| 2,7128E-10  | 1,8721E-07  |
| 7,58848E-10 | 4,90169E-07 |
| 7,81315E-10 | 4,90169E-07 |
| 8,72064E-10 | 5,23314E-07 |
| 9,2052E-10  | 5,29376E-07 |
| 1,43205E-09 | 7,90605E-07 |
| 4,30731E-09 | 2,28652E-06 |
| 4,64862E-09 | 2,3763E-06  |
| 9,98235E-09 | 4,92059E-06 |
| 3,62548E-08 | 1,61416E-05 |
| 6,22348E-08 | 2,68426E-05 |
| 9,8446E-08  | 4,11743E-05 |
| 1,09144E-07 | 4,4306E-05  |
| 1,38431E-07 | 5,45892E-05 |
| 3,66539E-07 | 0,000136729 |
| 5,08737E-07 | 0,000184779 |
| 7,44147E-07 | 0,000253558 |
| 7,57945E-07 | 0,000253558 |
| 8,24518E-07 | 0,000264651 |
| 8,45503E-07 | 0,000265219 |
| 1,10229E-06 | 0,000338085 |
| 1,15693E-06 | 0,000347128 |
| 1,43812E-06 | 0,000422318 |
| 1,89459E-06 | 0,000533656 |
| 2,2321E-06  | 0,000616149 |
| 2,45557E-06 | 0,000651765 |
| 2,60668E-06 | 0,00067882  |
| 3,08292E-06 | 0,000787972 |
| 3,68849E-06 | 0,000925609 |
| 4,18767E-06 | 0,000998112 |
| 4,19436E-06 | 0,000998112 |
| 7,97286E-06 | 0,001774861 |
| 1,03662E-05 | 0,002167795 |
| 1,08133E-05 | 0,002227541 |
| 1,25515E-05 | 0,002547587 |
| 2,03728E-05 | 0,004016928 |
| 2,27059E-05 | 0,004352602 |

## Downregulated

|             |             |
|-------------|-------------|
| 2,54723E-05 | 0,004750937 |
| 2,835E-05   | 0,005217147 |
| 3,46317E-05 | 0,00612804  |
| 3,55985E-05 | 0,006219366 |
| 3,8667E-05  | 0,00658866  |
| 4,25878E-05 | 0,007136073 |
| 4,29136E-05 | 0,007136073 |
| 5,21073E-05 | 0,008362615 |
| 6,35458E-05 | 0,009854603 |
| 7,55309E-05 | 0,011209432 |
| 7,71153E-05 | 0,01132282  |
| 7,89632E-05 | 0,011472109 |
| 8,59434E-05 | 0,012103985 |
| 8,55588E-05 | 0,012103985 |
| 8,92307E-05 | 0,012315615 |
| 9,42571E-05 | 0,012389866 |
| 9,72454E-05 | 0,012543749 |
| 0,000105058 | 0,013262173 |
| 0,000105698 | 0,013262173 |
| 0,000117036 | 0,014294925 |
| 0,000125044 | 0,014625965 |
| 0,000123027 | 0,014625965 |
| 0,000124583 | 0,014625965 |
| 0,000130746 | 0,015115894 |
| 0,000135327 | 0,015436191 |
| 0,000141356 | 0,015861789 |
| 0,000154337 | 0,01704122  |
| 0,000166139 | 0,017683711 |
| 0,000165167 | 0,017683711 |
| 0,000168596 | 0,017763055 |
| 0,000175491 | 0,018135494 |
| 0,000181069 | 0,018399483 |
| 0,000183022 | 0,018438446 |
| 0,000212265 | 0,020856574 |
| 0,000213069 | 0,020856574 |
| 0,000217801 | 0,021021558 |
| 0,000228719 | 0,021922119 |
| 0,000247264 | 0,02337491  |
| 0,000251965 | 0,02365728  |
| 0,000264761 | 0,024361506 |
| 0,000271537 | 0,024819604 |
| 0,000273408 | 0,02482613  |
| 0,000276363 | 0,024930441 |
| 0,000311083 | 0,027174458 |
| 0,000323803 | 0,027668608 |
| 0,000338083 | 0,028592402 |
| 0,000349346 | 0,028604101 |
| 0,000358631 | 0,028946321 |
| 0,000369797 | 0,029332995 |
| 0,000376517 | 0,029695374 |
| 0,000411117 | 0,031699643 |
| 0,00043395  | 0,033090453 |
| 0,0004406   | 0,033413007 |
| 0,00044469  | 0,033538835 |
| 0,000447178 | 0,033543185 |

## Downregulated

|             |             |
|-------------|-------------|
| 0,000455997 | 0,03383694  |
| 0,000466469 | 0,034428918 |
| 0,000528881 | 0,03821791  |
| 0,000567671 | 0,04017947  |
| 0,000581708 | 0,040962946 |
| 0,000610534 | 0,042344668 |
| 0,000635429 | 0,04341682  |
| 0,000680172 | 0,045956658 |
| 0,00068957  | 0,046201173 |
| 0,000728129 | 0,04831556  |
| 0,000733541 | 0,048441817 |
| 0,000767663 | 0,050214628 |
| 0,000782222 | 0,050717732 |
| 0,000786378 | 0,050717732 |
| 0,000820459 | 0,051944817 |
| 0,000872143 | 0,054467501 |
| 0,000884268 | 0,05472946  |
| 0,000898844 | 0,055383247 |
| 0,000912935 | 0,055794581 |
| 0,000921155 | 0,055999562 |
| 0,000943249 | 0,056648967 |
| 0,000974369 | 0,05771778  |
| 0,000972638 | 0,05771778  |
| 0,000979817 | 0,05779244  |
| 0,001019422 | 0,059618936 |
| 0,001070774 | 0,061583923 |
| 0,00107087  | 0,061583923 |
| 0,001093206 | 0,062221032 |
| 0,001099981 | 0,062221032 |
| 0,001092818 | 0,062221032 |
| 0,001184252 | 0,065642763 |
| 0,001181559 | 0,065642763 |
| 0,001198307 | 0,06615611  |
| 0,001244357 | 0,068420139 |
| 0,001286198 | 0,070166444 |
| 0,001370054 | 0,073577751 |
| 0,00136742  | 0,073577751 |
| 0,001380191 | 0,073834882 |
| 0,001406304 | 0,074653128 |
| 0,001468168 | 0,076466642 |
| 0,00154336  | 0,07948306  |
| 0,001582788 | 0,080909803 |
| 0,001606039 | 0,081494681 |
| 0,001602702 | 0,081494681 |
| 0,001634742 | 0,081844726 |
| 0,001627458 | 0,081844726 |
| 0,001671879 | 0,08319453  |
| 0,001717651 | 0,083770398 |
| 0,001727833 | 0,083970246 |
| 0,00176006  | 0,085236321 |
| 0,001877877 | 0,089475562 |
| 0,001876901 | 0,089475562 |
| 0,001896032 | 0,089619958 |
| 0,002062386 | 0,094255126 |
| 0,002089211 | 0,095165992 |

## Downregulated

|             |             |
|-------------|-------------|
| 0,002097054 | 0,095208998 |
| 0,002109675 | 0,095310888 |
| 0,002134309 | 0,095498626 |
| 0,002138029 | 0,095498626 |
| 0,002155533 | 0,095661302 |
| 0,002218229 | 0,096297492 |
| 0,002274211 | 0,097783968 |
| 0,002318974 | 0,098178394 |
| 0,002308647 | 0,098178394 |
| 0,002307441 | 0,098178394 |
| 0,002363398 | 0,0985487   |
| 0,002390582 | 0,099354233 |

**Table S3:****Regions differentially enriched in H3K79me3 between double fusion- and MA4/EV-hESC blood derivative**

| peak_id | peak_start | peak_end  | 7E+05 | locus_start | locus_end | gene_symbol | overlap_start | overlap_end |
|---------|------------|-----------|-------|-------------|-----------|-------------|---------------|-------------|
| peak:1  | 21618836   | 21619430  | 594   | 21554783    | 21719308  | ECE1        | 21618836      | 21619430    |
| peak:2  | 27871020   | 27871960  | 940   | 27767914    | 27873410  | WASF2       | 27871020      | 27871960    |
| peak:3  | 41155277   | 41157219  | 1942  | 41144284    | 41157806  | NFYC        | 41155277      | 41157219    |
| peak:4  | 43767794   | 43768815  | 1021  | 43758928    | 43795178  | TIE1        | 43767794      | 43768815    |
| peak:5  | 47695316   | 47696362  | 1046  | 47672771    | 47723818  | TAL1        | 47695316      | 47696362    |
| peak:6  | 52092228   | 52092904  | 676   | 52013924    | 52263685  | OSBPL9      | 52092228      | 52092904    |
| peak:7  | 62226710   | 62227754  | 1044  | 62199623    | 62549757  | PATJ        | 62226710      | 62227754    |
| peak:8  | 91852668   | 91853280  | 612   | 91650423    | 91918415  | HFM1        | 91852668      | 91853280    |
| peak:9  | 92280907   | 92281736  | 829   | 92153990    | 92393243  | TGFBR3      | 92280907      | 92281736    |
| peak:10 | 94703947   | 94704550  | 603   | 94624102    | 94812278  | ARHGAP29    | 94703947      | 94704550    |
| peak:11 | 108502605  | 108503363 | 758   | 108079204   | 108621488 | VAV3        | 108502605     | 108503363   |
| peak:12 | 114481375  | 114482734 | 1359  | 114459956   | 114514019 | HIPK1       | 114481375     | 114482734   |
| peak:13 | 120176292  | 120176979 | 687   | 120166153   | 120222404 | ZNF697      | 120176292     | 120176979   |
| peak:14 | 154463886  | 154464492 | 606   | 154426098   | 154474610 | SHE         | 154463886     | 154464492   |
| peak:15 | 157250423  | 157251400 | 977   | 157103269   | 157315346 | ETV3        | 157250423     | 157251400   |
| peak:16 | 157986113  | 157987159 | 1046  | 157887349   | 158103061 | KIRREL      | 157986113     | 157987159   |
| peak:17 | 163039109  | 163041536 | 2427  | 162938501   | 163107329 | RGS4        | 163039109     | 163041536   |
| peak:18 | 183783701  | 183785394 | 1693  | 183698362   | 183845013 | RGL1        | 183783701     | 183785394   |
| peak:19 | 201510376  | 201510995 | 619   | 201482710   | 201553241 | RPS10P7     | 201510376     | 201510995   |
| peak:20 | 204647245  | 204647779 | 534   | 204574483   | 204726189 | LRRN2       | 204647245     | 204647779   |
| peak:21 | 208383479  | 208384731 | 1252  | 208143618   | 209009916 | PLXNA2      | 208383479     | 208384731   |
| peak:22 | 220703366  | 220703980 | 614   | 220573706   | 220782598 | MARK1       | 220703366     | 220703980   |
| peak:23 | 232629101  | 232629915 | 814   | 232276214   | 232795940 | SIPA1L2     | 232629101     | 232629915   |
| peak:24 | 17932183   | 17934084  | 1901  | 17824513    | 17935136  | SMC6        | 17932183      | 17934084    |
| peak:25 | 28634051   | 28635122  | 1071  | 28417452    | 28668758  | FOSL2       | 28634051      | 28635122    |
| peak:26 | 46534835   | 46535854  | 1019  | 46214208    | 46656771  | EPAS1       | 46534835      | 46535854    |
| peak:27 | 48759327   | 48760668  | 1341  | 48712609    | 48801122  | STON1       | 48759327      | 48760668    |
| peak:28 | 54168333   | 54168855  | 522   | 54100888    | 54270193  | PSME4       | 54168333      | 54168855    |
| peak:29 | 54690992   | 54692859  | 1867  | 54620763    | 54720378  | SPTBN1      | 54690992      | 54692859    |
| peak:30 | 54702819   | 54703781  | 962   | 54620763    | 54720378  | SPTBN1      | 54702819      | 54703781    |
| peak:31 | 72644998   | 72645642  | 644   | 72099974    | 72714084  | CYP26B1     | 72644998      | 72645642    |
| peak:32 | 109229797  | 109230389 | 592   | 109108195   | 109303602 | LIMS1       | 109229797     | 109230389   |
| peak:33 | 109234180  | 109234886 | 706   | 109108195   | 109303602 | LIMS1       | 109234180     | 109234886   |
| peak:34 | 120125114  | 120125747 | 633   | 120124455   | 120157348 | DBI         | 120125114     | 120125747   |
| peak:35 | 121019287  | 121019855 | 568   | 120989313   | 121057066 | RALB        | 121019287     | 121019855   |
| peak:36 | 121029069  | 121029803 | 734   | 120989313   | 121057066 | RALB        | 121029069     | 121029803   |
| peak:37 | 128113068  | 128113860 | 792   | 128076279   | 128138400 | MAP3K2      | 128113068     | 128113860   |
| peak:38 | 133011780  | 133012292 | 512   | 132967090   | 133015097 | MIR663B     | 133011780     | 133012292   |
| peak:39 | 133038386  | 133038832 | 446   | 133015098   | 133094844 | ANKRD30BL   | 133038386     | 133038832   |
| peak:40 | 145187137  | 145187678 | 541   | 145182640   | 145351746 | ZEB2        | 145187137     | 145187678   |
| peak:41 | 145214821  | 145215668 | 847   | 145182640   | 145351746 | ZEB2        | 145214821     | 145215668   |
| peak:42 | 145235431  | 145235972 | 541   | 145182640   | 145351746 | ZEB2        | 145235431     | 145235972   |
| peak:43 | 149902014  | 149904254 | 2240  | 149875716   | 150060267 | LYPD6B      | 149902014     | 149904254   |
| peak:44 | 165598915  | 165600426 | 1511  | 165516586   | 165755356 | COBLL1      | 165598915     | 165600426   |
| peak:45 | 169333032  | 169334164 | 1132  | 169208433   | 169376106 | CERS6       | 169333032     | 169334164   |
| peak:46 | 169337729  | 169338323 | 594   | 169208433   | 169376106 | CERS6       | 169337729     | 169338323   |
| peak:47 | 175525268  | 175526385 | 1117  | 175407155   | 175588413 | WIPF1       | 175525268     | 175526385   |

|         |           |           |      |           |           |          |           |           |
|---------|-----------|-----------|------|-----------|-----------|----------|-----------|-----------|
| peak:48 | 175695012 | 175695857 | 845  | 175670774 | 175951272 | CHN1     | 175695012 | 175695857 |
| peak:49 | 175707639 | 175708499 | 860  | 175670774 | 175951272 | CHN1     | 175707639 | 175708499 |
| peak:50 | 177146909 | 177147362 | 453  | 177093905 | 177299951 | MTX2     | 177146909 | 177147362 |
| peak:51 | 188300740 | 188301564 | 824  | 188013460 | 188366120 | CALCRL   | 188300740 | 188301564 |
| peak:52 | 188303927 | 188304492 | 565  | 188013460 | 188366120 | CALCRL   | 188303927 | 188304492 |
| peak:53 | 188305395 | 188306865 | 1470 | 188013460 | 188366120 | CALCRL   | 188305395 | 188306865 |
| peak:54 | 188308114 | 188308817 | 703  | 188013460 | 188366120 | CALCRL   | 188308114 | 188308817 |
| peak:55 | 188311462 | 188312080 | 618  | 188013460 | 188366120 | CALCRL   | 188311462 | 188312080 |
| peak:56 | 188408262 | 188409936 | 1674 | 188366121 | 188787807 | TFPI     | 188408262 | 188409936 |
| peak:57 | 189838944 | 189842924 | 3980 | 189746966 | 189840958 | COL3A1   | 189838944 | 189840958 |
| peak:57 | 189838944 | 189842924 | 3980 | 189840959 | 189842852 | MIR1245A | 189840959 | 189842852 |
| peak:57 | 189838944 | 189842924 | 3980 | 189842853 | 189849641 | MIR1245B | 189842853 | 189842924 |
| peak:58 | 189844676 | 189851425 | 6749 | 189842853 | 189849641 | MIR1245B | 189844676 | 189849641 |
| peak:58 | 189844676 | 189851425 | 6749 | 189849642 | 189858375 | COL3A1   | 189849642 | 189851425 |
| peak:59 | 190021826 | 190023085 | 1259 | 190021222 | 190175382 | COL5A2   | 190021826 | 190023085 |
| peak:60 | 204395160 | 204398532 | 3372 | 204329741 | 204485628 | RAPH1    | 204395160 | 204398532 |
| peak:61 | 218706287 | 218706682 | 395  | 218650028 | 218883687 | TNS1     | 218706287 | 218706682 |
| peak:62 | 218715866 | 218716708 | 842  | 218650028 | 218883687 | TNS1     | 218715866 | 218716708 |
| peak:63 | 218716730 | 218719036 | 2306 | 218650028 | 218883687 | TNS1     | 218716730 | 218719036 |
| peak:64 | 225815144 | 225815631 | 487  | 225560167 | 225843518 | DOCK10   | 225815144 | 225815631 |
| peak:65 | 238298545 | 238299318 | 773  | 238123121 | 238358951 | COL6A3   | 238298545 | 238299318 |
| peak:66 | 238300753 | 238301271 | 518  | 238123121 | 238358951 | COL6A3   | 238300753 | 238301271 |
| peak:67 | 238304977 | 238305456 | 479  | 238123121 | 238358951 | COL6A3   | 238304977 | 238305456 |
| peak:68 | 238306153 | 238309255 | 3102 | 238123121 | 238358951 | COL6A3   | 238306153 | 238309255 |
| peak:69 | 238621449 | 238621986 | 537  | 238517997 | 238692545 | LRRFIP1  | 238621449 | 238621986 |
| peak:70 | 240135369 | 240136093 | 724  | 240114464 | 240168743 | MGC16025 | 240135369 | 240136093 |
| peak:71 | 240145501 | 240146534 | 1033 | 240114464 | 240168743 | MGC16025 | 240145501 | 240146534 |
| peak:72 | 240149333 | 240149905 | 572  | 240114464 | 240168743 | MGC16025 | 240149333 | 240149905 |
| peak:73 | 240212422 | 240213123 | 701  | 240168744 | 240223745 | HDAC4    | 240212422 | 240213123 |
| peak:74 | 240228231 | 240229136 | 905  | 240223746 | 240250328 | MIR4269  | 240228231 | 240229136 |
| peak:75 | 8554114   | 8554720   | 606  | 8018481   | 8578480   | LMCD1    | 8554114   | 8554720   |
| peak:76 | 8554930   | 8556174   | 1244 | 8018481   | 8578480   | LMCD1    | 8554930   | 8556174   |
| peak:77 | 8556581   | 8557182   | 601  | 8018481   | 8578480   | LMCD1    | 8556581   | 8557182   |
| peak:78 | 8559899   | 8560829   | 930  | 8018481   | 8578480   | LMCD1    | 8559899   | 8560829   |
| peak:79 | 14763030  | 14763577  | 547  | 14708493  | 14829669  | C3orf20  | 14763030  | 14763577  |
| peak:80 | 14853968  | 14855571  | 1603 | 14829670  | 14956524  | FGD5     | 14853968  | 14855571  |
| peak:81 | 17917820  | 17918600  | 780  | 17162158  | 18125534  | TBC1D5   | 17917820  | 17918600  |
| peak:82 | 52085036  | 52085872  | 836  | 52060210  | 52094794  | DUSP7    | 52085036  | 52085872  |
| peak:83 | 55508987  | 55510075  | 1088 | 55238517  | 55583304  | WNT5A    | 55508987  | 55510075  |
| peak:84 | 56795772  | 56796406  | 634  | 56763366  | 57022484  | ARHGEF3  | 56795772  | 56796406  |
| peak:85 | 63842015  | 63843350  | 1335 | 63827320  | 63849915  | THOC7    | 63842015  | 63843350  |
| peak:86 | 69279329  | 69280973  | 1644 | 69210728  | 69690159  | FRMD4B   | 69279329  | 69280973  |
| peak:87 | 73591060  | 73591723  | 663  | 73296906  | 74122207  | PDZRN3   | 73591060  | 73591723  |
| peak:88 | 73599291  | 73601321  | 2030 | 73296906  | 74122207  | PDZRN3   | 73599291  | 73601321  |
| peak:89 | 73641145  | 73641964  | 819  | 73296906  | 74122207  | PDZRN3   | 73641145  | 73641964  |
| peak:90 | 73658671  | 73660460  | 1789 | 73296906  | 74122207  | PDZRN3   | 73658671  | 73660460  |
| peak:91 | 79061908  | 79062259  | 351  | 78178797  | 80804919  | ROBO1    | 79061908  | 79062259  |
| peak:92 | 93710720  | 93711323  | 603  | 93695959  | 93723218  | ARL13B   | 93710720  | 93711323  |
| peak:93 | 149258030 | 149258652 | 622  | 149143969 | 149283738 | TM4SF4   | 149258030 | 149258652 |
| peak:94 | 149301705 | 149302474 | 769  | 149283739 | 149445700 | WWTR1    | 149301705 | 149302474 |

|          |           |           |      |           |           |          |           |           |
|----------|-----------|-----------|------|-----------|-----------|----------|-----------|-----------|
| peak:95  | 149319672 | 149320175 | 503  | 149283739 | 149445700 | WWTR1    | 149319672 | 149320175 |
| peak:96  | 149322137 | 149323389 | 1252 | 149283739 | 149445700 | WWTR1    | 149322137 | 149323389 |
| peak:97  | 149341930 | 149343051 | 1121 | 149283739 | 149445700 | WWTR1    | 149341930 | 149343051 |
| peak:98  | 150464111 | 150464934 | 823  | 150451503 | 150570405 | SIAH2    | 150464111 | 150464934 |
| peak:99  | 150821094 | 150821835 | 741  | 150747119 | 150862786 | MED12L   | 150821094 | 150821835 |
| peak:100 | 152556204 | 152556776 | 572  | 152342734 | 152716382 | P2RY1    | 152556204 | 152556776 |
| peak:101 | 155618589 | 155619233 | 644  | 155580287 | 155713331 | GMPS     | 155618589 | 155619233 |
| peak:102 | 169878401 | 169879141 | 740  | 169827626 | 169919878 | PHC3     | 169878401 | 169879141 |
| peak:103 | 171518375 | 171518966 | 591  | 171285301 | 171544821 | PLD1     | 171518375 | 171518966 |
| peak:104 | 498352    | 498925    | 573  | 492975    | 556220    | PIGG     | 498352    | 498925    |
| peak:105 | 11411842  | 11412580  | 738  | 11400495  | 12458263  | HS3ST1   | 11411842  | 11412580  |
| peak:106 | 16849393  | 16850772  | 1379 | 16649796  | 17207140  | LDB2     | 16849393  | 16850772  |
| peak:107 | 16870346  | 16871132  | 786  | 16649796  | 17207140  | LDB2     | 16870346  | 16871132  |
| peak:108 | 41201940  | 41202563  | 623  | 40805544  | 41237766  | APBB2    | 41201940  | 41202563  |
| peak:109 | 41433689  | 41434541  | 852  | 41310852  | 41722979  | LIMCH1   | 41433689  | 41434541  |
| peak:110 | 46316153  | 46316998  | 845  | 46258740  | 46651836  | GABRA2   | 46316153  | 46316998  |
| peak:111 | 55968864  | 55970391  | 1527 | 55792673  | 56102075  | KDR      | 55968864  | 55970391  |
| peak:112 | 55976377  | 55977009  | 632  | 55792673  | 56102075  | KDR      | 55976377  | 55977009  |
| peak:113 | 56407226  | 56411318  | 4092 | 56288872  | 56435727  | CLOCK    | 56407226  | 56411318  |
| peak:114 | 70296489  | 70296866  | 377  | 70253922  | 70448546  | UGT2B4   | 70296489  | 70296866  |
| peak:115 | 89078604  | 89079070  | 466  | 89013107  | 89179228  | ABCG2    | 89078604  | 89079070  |
| peak:116 | 98336060  | 98336772  | 712  | 97912816  | 99123459  | STPG2    | 98336060  | 98336772  |
| peak:117 | 99503131  | 99503880  | 749  | 99380664  | 99715027  | TSPAN5   | 99503131  | 99503880  |
| peak:118 | 102236712 | 102237215 | 503  | 101932450 | 102268781 | PPP3CA   | 102236712 | 102237215 |
| peak:119 | 106819006 | 106819440 | 434  | 106724284 | 106992738 | NPNT     | 106819006 | 106819440 |
| peak:120 | 111560606 | 111561890 | 1284 | 111470742 | 112314916 | PITX2    | 111560606 | 111561890 |
| peak:121 | 111561918 | 111563250 | 1332 | 111470742 | 112314916 | PITX2    | 111561918 | 111563250 |
| peak:122 | 121989051 | 121990325 | 1274 | 121918844 | 122039584 | NDNF     | 121989051 | 121990325 |
| peak:123 | 140866867 | 140867382 | 515  | 140831078 | 141126836 | MAML3    | 140866867 | 140867382 |
| peak:124 | 170532926 | 170533631 | 705  | 170356299 | 170537725 | NEK1     | 170532926 | 170533631 |
| peak:125 | 171970641 | 171971262 | 621  | 171872974 | 173412239 | GALNTL6  | 171970641 | 171971262 |
| peak:126 | 174451585 | 174455688 | 4103 | 174389030 | 174828103 | HAND2    | 174451585 | 174455688 |
| peak:127 | 174456733 | 174457313 | 580  | 174389030 | 174828103 | HAND2    | 174456733 | 174457313 |
| peak:128 | 177700357 | 177701207 | 850  | 177477493 | 177972443 | VEGFC    | 177700357 | 177701207 |
| peak:129 | 33815995  | 33816342  | 347  | 33666504  | 33914307  | ADAMTS12 | 33815995  | 33816342  |
| peak:130 | 34682324  | 34683635  | 1311 | 34349903  | 34763466  | RAI14    | 34682324  | 34683635  |
| peak:131 | 71146585  | 71147075  | 490  | 70956662  | 71209054  | CARTPT   | 71146585  | 71147075  |
| peak:132 | 75915631  | 75916611  | 980  | 75912092  | 75944780  | F2RL2    | 75915631  | 75916611  |
| peak:133 | 75916941  | 75919331  | 2390 | 75912092  | 75944780  | F2RL2    | 75916941  | 75919331  |
| peak:134 | 76015283  | 76017317  | 2034 | 76010049  | 76063350  | F2R      | 76015283  | 76017317  |
| peak:135 | 82842228  | 82843032  | 804  | 82634807  | 82900423  | VCAN     | 82842228  | 82843032  |
| peak:136 | 82993967  | 82995862  | 1895 | 82900424  | 83195771  | HAPLN1   | 82993967  | 82995862  |
| peak:137 | 83675308  | 83675942  | 634  | 83195772  | 84629436  | EDIL3    | 83675308  | 83675942  |
| peak:138 | 88678070  | 88678649  | 579  | 88050183  | 88756229  | MEF2C    | 88678070  | 88678649  |
| peak:139 | 119438659 | 119439276 | 617  | 119382637 | 120570241 | PRR16    | 119438659 | 119439276 |
| peak:140 | 134371684 | 134378062 | 6378 | 134369468 | 134528599 | PITX1    | 134371684 | 134378062 |
| peak:141 | 134378989 | 134379580 | 591  | 134369468 | 134528599 | PITX1    | 134378989 | 134379580 |
| peak:142 | 134379602 | 134380282 | 680  | 134369468 | 134528599 | PITX1    | 134379602 | 134380282 |
| peak:143 | 134380973 | 134381561 | 588  | 134369468 | 134528599 | PITX1    | 134380973 | 134381561 |
| peak:144 | 138841628 | 138842123 | 495  | 138780040 | 138852331 | ECSCR    | 138841628 | 138842123 |



|          |           |           |      |           |           |          |           |           |
|----------|-----------|-----------|------|-----------|-----------|----------|-----------|-----------|
| peak:145 | 149531548 | 149532482 | 934  | 149504776 | 149540883 | PDGFRB   | 149531548 | 149532482 |
| peak:146 | 153628730 | 153629524 | 794  | 153494408 | 153751441 | GALNT10  | 153628730 | 153629524 |
| peak:147 | 168710264 | 168710743 | 479  | 168709416 | 168869385 | SLIT3    | 168710264 | 168710743 |
| peak:148 | 168720216 | 168724104 | 3888 | 168709416 | 168869385 | SLIT3    | 168720216 | 168724104 |
| peak:149 | 171607930 | 171608476 | 546  | 171524612 | 171618261 | STK10    | 171607930 | 171608476 |
| peak:150 | 173321859 | 173322378 | 519  | 173179499 | 173386363 | CPEB4    | 173321859 | 173322378 |
| peak:151 | 178013980 | 178014644 | 664  | 177678584 | 178035805 | COL23A1  | 178013980 | 178014644 |
| peak:152 | 179767625 | 179769376 | 1751 | 179749694 | 179850866 | GFPT2    | 179767625 | 179769376 |
| peak:153 | 24904932  | 24905894  | 962  | 24826613  | 25090224  | FAM65B   | 24904932  | 24905894  |
| peak:154 | 33789984  | 33790510  | 526  | 33764350  | 33816160  | MLN      | 33789984  | 33790510  |
| peak:155 | 41906137  | 41906900  | 763  | 41899055  | 42017430  | CCND3    | 41906137  | 41906900  |
| peak:156 | 43069195  | 43070889  | 1694 | 43036095  | 43119539  | PTK7     | 43069195  | 43070889  |
| peak:157 | 44670589  | 44671034  | 445  | 44379315  | 44738564  | MIR4642  | 44670589  | 44671034  |
| peak:158 | 44671581  | 44672269  | 688  | 44379315  | 44738564  | MIR4642  | 44671581  | 44672269  |
| peak:159 | 86163397  | 86164057  | 660  | 85816629  | 86218751  | NT5E     | 86163397  | 86164057  |
| peak:160 | 91226084  | 91226619  | 535  | 91134700  | 91764199  | MAP3K7   | 91226084  | 91226619  |
| peak:161 | 98343495  | 98344020  | 525  | 98167346  | 98877493  | MIR2113  | 98343495  | 98344020  |
| peak:162 | 138809524 | 138810570 | 1046 | 138788506 | 138953236 | NHSL1    | 138809524 | 138810570 |
| peak:163 | 147531349 | 147531922 | 573  | 147526429 | 147737961 | STXBP5   | 147531349 | 147531922 |
| peak:164 | 157262218 | 157262772 | 554  | 157178733 | 157500926 | ARID1B   | 157262218 | 157262772 |
| peak:165 | 6052643   | 6053433   | 790  | 6048810   | 6059944   | AIMP2    | 6052643   | 6053433   |
| peak:166 | 22258202  | 22258490  | 288  | 22093851  | 22468217  | RAPGEF5  | 22258202  | 22258490  |
| peak:167 | 26074531  | 26075475  | 944  | 25935119  | 26090726  | MIR148A  | 26074531  | 26075475  |
| peak:168 | 27202934  | 27209614  | 6680 | 27200723  | 27207165  | HOXA9    | 27202934  | 27207165  |
| peak:168 | 27202934  | 27209614  | 6680 | 27207166  | 27211568  | MIR196B  | 27207166  | 27209614  |
| peak:169 | 27210826  | 27219500  | 8674 | 27207166  | 27211568  | MIR196B  | 27210826  | 27211568  |
| peak:169 | 27210826  | 27219500  | 8674 | 27211569  | 27222357  | HOXA10   | 27211569  | 27219500  |
| peak:170 | 27232641  | 27233483  | 842  | 27232284  | 27239882  | HOXA13   | 27232641  | 27233483  |
| peak:171 | 27234692  | 27235912  | 1220 | 27232284  | 27239882  | HOXA13   | 27234692  | 27235912  |
| peak:172 | 27281139  | 27284013  | 2874 | 27261103  | 27485780  | EVX1     | 27281139  | 27284013  |
| peak:173 | 27811436  | 27811765  | 329  | 27740807  | 27905694  | TAX1BP1  | 27811436  | 27811765  |
| peak:174 | 29700851  | 29701893  | 1042 | 29661936  | 29722607  | MIR550A3 | 29700851  | 29701893  |
| peak:175 | 29702454  | 29703401  | 947  | 29661936  | 29722607  | MIR550A3 | 29702454  | 29703401  |
| peak:176 | 29716072  | 29717020  | 948  | 29661936  | 29722607  | MIR550A3 | 29716072  | 29717020  |
| peak:177 | 29717084  | 29718133  | 1049 | 29661936  | 29722607  | MIR550A3 | 29717084  | 29718133  |
| peak:178 | 30960869  | 30961483  | 614  | 30924392  | 30982377  | AQP1     | 30960869  | 30961483  |
| peak:179 | 32328879  | 32329394  | 515  | 31918549  | 32434203  | PDE1C    | 32328879  | 32329394  |
| peak:180 | 33958414  | 33958857  | 443  | 33667270  | 34321210  | BMPER    | 33958414  | 33958857  |
| peak:181 | 35284954  | 35285617  | 663  | 35259743  | 35514228  | TBX20    | 35284954  | 35285617  |
| peak:182 | 43695681  | 43696256  | 575  | 43406594  | 43695916  | STK17A   | 43695681  | 43695916  |
| peak:182 | 43695681  | 43696256  | 575  | 43695917  | 43783706  | COA1     | 43695917  | 43696256  |
| peak:183 | 79765871  | 79770957  | 5086 | 79582357  | 79881981  | GNAI1    | 79765871  | 79770957  |
| peak:184 | 94029143  | 94029692  | 549  | 93828782  | 94093103  | COL1A2   | 94029143  | 94029692  |
| peak:185 | 97950456  | 97951212  | 756  | 97896272  | 97970703  | BRI3     | 97950456  | 97951212  |
| peak:186 | 1780828   | 1781459   | 631  | 1768774   | 1876422   | ARHGEF10 | 1780828   | 1781459   |
| peak:187 | 10582724  | 10583330  | 606  | 10559085  | 10635487  | SOX7     | 10582724  | 10583330  |
| peak:188 | 20038777  | 20039619  | 842  | 19918650  | 20047710  | SLC18A1  | 20038777  | 20039619  |
| peak:189 | 37669114  | 37669986  | 872  | 37637252  | 37680916  | ADGRA2   | 37669114  | 37669986  |
| peak:190 | 37670156  | 37670966  | 810  | 37637252  | 37680916  | ADGRA2   | 37670156  | 37670966  |
| peak:191 | 37897298  | 37898459  | 1161 | 37856103  | 37925515  | EIF4EBP1 | 37897298  | 37898459  |

|          |           |           |      |           |           |         |           |           |
|----------|-----------|-----------|------|-----------|-----------|---------|-----------|-----------|
| peak:192 | 48864485  | 48865178  | 693  | 48761735  | 48872753  | PRKDC   | 48864485  | 48865178  |
| peak:193 | 49295108  | 49296034  | 926  | 49284433  | 49740934  | EFCAB1  | 49295108  | 49296034  |
| peak:194 | 49828980  | 49834100  | 5120 | 49740935  | 49900447  | SNAI2   | 49828980  | 49834100  |
| peak:195 | 58969532  | 58970281  | 749  | 58549608  | 59115468  | FAM110B | 58969532  | 58970281  |
| peak:196 | 79428973  | 79429516  | 543  | 78670809  | 79540874  | PKIA    | 79428973  | 79429516  |
| peak:197 | 93033549  | 93034137  | 588  | 92632817  | 93456871  | RUNX1T1 | 93033549  | 93034137  |
| peak:198 | 95445551  | 95448329  | 2778 | 95361864  | 95513467  | RAD54B  | 95445551  | 95448329  |
| peak:199 | 102524986 | 102525522 | 536  | 102442895 | 102654053 | GRHL2   | 102524986 | 102525522 |
| peak:200 | 102546839 | 102547518 | 679  | 102442895 | 102654053 | GRHL2   | 102546839 | 102547518 |
| peak:201 | 106337054 | 106338228 | 1174 | 105966200 | 106992762 | ZFPM2   | 106337054 | 106338228 |
| peak:202 | 106338309 | 106340334 | 2025 | 105966200 | 106992762 | ZFPM2   | 106338309 | 106340334 |
| peak:203 | 106340804 | 106341562 | 758  | 105966200 | 106992762 | ZFPM2   | 106340804 | 106341562 |
| peak:204 | 106374855 | 106375487 | 632  | 105966200 | 106992762 | ZFPM2   | 106374855 | 106375487 |
| peak:205 | 106380509 | 106381181 | 672  | 105966200 | 106992762 | ZFPM2   | 106380509 | 106381181 |
| peak:206 | 106381391 | 106382004 | 613  | 105966200 | 106992762 | ZFPM2   | 106381391 | 106382004 |
| peak:207 | 106413579 | 106414280 | 701  | 105966200 | 106992762 | ZFPM2   | 106413579 | 106414280 |
| peak:208 | 124169312 | 124169710 | 398  | 124164792 | 124211184 | FAM83A  | 124169312 | 124169710 |
| peak:209 | 144771302 | 144772218 | 916  | 144749289 | 144772953 | ZNF707  | 144771302 | 144772218 |
| peak:210 | 16484326  | 16485027  | 701  | 16356917  | 17002912  | BNC2    | 16484326  | 16485027  |
| peak:211 | 16789404  | 16790188  | 784  | 16356917  | 17002912  | BNC2    | 16789404  | 16790188  |
| peak:212 | 16828950  | 16832075  | 3125 | 16356917  | 17002912  | BNC2    | 16828950  | 16832075  |
| peak:213 | 16832166  | 16832985  | 819  | 16356917  | 17002912  | BNC2    | 16832166  | 16832985  |
| peak:214 | 16833064  | 16835139  | 2075 | 16356917  | 17002912  | BNC2    | 16833064  | 16835139  |
| peak:215 | 16835678  | 16838916  | 3238 | 16356917  | 17002912  | BNC2    | 16835678  | 16838916  |
| peak:216 | 16841587  | 16845686  | 4099 | 16356917  | 17002912  | BNC2    | 16841587  | 16845686  |
| peak:217 | 16850699  | 16852788  | 2089 | 16356917  | 17002912  | BNC2    | 16850699  | 16852788  |
| peak:218 | 16853303  | 16855571  | 2268 | 16356917  | 17002912  | BNC2    | 16853303  | 16855571  |
| peak:219 | 16855770  | 16857548  | 1778 | 16356917  | 17002912  | BNC2    | 16855770  | 16857548  |
| peak:220 | 16864908  | 16866306  | 1398 | 16356917  | 17002912  | BNC2    | 16864908  | 16866306  |
| peak:221 | 18549881  | 18550727  | 846  | 18523692  | 18699720  | MIR3152 | 18549881  | 18550727  |
| peak:222 | 20693805  | 20694368  | 563  | 20687207  | 20768198  | MIR491  | 20693805  | 20694368  |
| peak:223 | 27126520  | 27127273  | 753  | 27057420  | 27220305  | TEK     | 27126520  | 27127273  |
| peak:224 | 27142964  | 27143524  | 560  | 27057420  | 27220305  | TEK     | 27142964  | 27143524  |
| peak:225 | 34116427  | 34117310  | 883  | 34087860  | 34152887  | DCAF12  | 34116427  | 34117310  |
| peak:226 | 37992368  | 37992931  | 563  | 37986781  | 38230935  | SHB     | 37992368  | 37992931  |
| peak:227 | 108027552 | 108028747 | 1195 | 107848729 | 108164036 | SLC44A1 | 108027552 | 108028747 |
| peak:228 | 108031856 | 108032804 | 948  | 107848729 | 108164036 | SLC44A1 | 108031856 | 108032804 |
| peak:229 | 111650827 | 111651505 | 678  | 111639663 | 111696640 | IKBKAP  | 111650827 | 111651505 |
| peak:230 | 112547947 | 112548821 | 874  | 112331831 | 112676727 | PALM2   | 112547947 | 112548821 |
| peak:231 | 124128773 | 124129673 | 900  | 124103166 | 124197444 | STOM    | 124128773 | 124129673 |
| peak:232 | 125796359 | 125797211 | 852  | 125749611 | 125836839 | GPR21   | 125796359 | 125797211 |
| peak:233 | 125800184 | 125800852 | 668  | 125749611 | 125836839 | GPR21   | 125800184 | 125800852 |
| peak:234 | 126129800 | 126131502 | 1702 | 126074652 | 126141665 | CRB2    | 126129800 | 126131502 |
| peak:235 | 130317788 | 130318293 | 505  | 130294416 | 130357877 | FAM129B | 130317788 | 130318293 |
| peak:236 | 134147587 | 134148770 | 1183 | 134106696 | 134158493 | FAM78A  | 134147587 | 134148770 |
| peak:237 | 134149070 | 134152060 | 2990 | 134106696 | 134158493 | FAM78A  | 134149070 | 134152060 |
| peak:238 | 137616525 | 137617372 | 847  | 137421328 | 137637433 | COL5A1  | 137616525 | 137617372 |
| peak:239 | 138973618 | 138974226 | 608  | 138920179 | 138998704 | NACC2   | 138973618 | 138974226 |
| peak:240 | 139423069 | 139424634 | 1565 | 139411041 | 139427158 | MIR4673 | 139423069 | 139424634 |
| peak:241 | 1093416   | 1094782   | 1366 | 1081438   | 1095269   | IDI1    | 1093416   | 1094782   |

|          |           |           |       |           |           |            |           |           |
|----------|-----------|-----------|-------|-----------|-----------|------------|-----------|-----------|
| peak:242 | 6144391   | 6145180   | 789   | 6117642   | 6171484   | RBM17      | 6144391   | 6145180   |
| peak:243 | 24633820  | 24634513  | 693   | 24554436  | 24651604  | MIR603     | 24633820  | 24634513  |
| peak:244 | 29946523  | 29947035  | 512   | 29907589  | 30187176  | SVIL       | 29946523  | 29947035  |
| peak:245 | 30329105  | 30330584  | 1479  | 30187177  | 30521343  | KIAA1462   | 30329105  | 30330584  |
| peak:246 | 33602986  | 33604361  | 1375  | 33435531  | 33842807  | NRP1       | 33602986  | 33604361  |
| peak:247 | 33612310  | 33623591  | 11281 | 33435531  | 33842807  | NRP1       | 33612310  | 33623591  |
| peak:248 | 69524126  | 69524508  | 382   | 69055605  | 69526943  | CTNNA3     | 69524126  | 69524508  |
| peak:249 | 71563416  | 71564435  | 1019  | 71475824  | 71687000  | COL13A1    | 71563416  | 71564435  |
| peak:250 | 72972242  | 72977264  | 5022  | 72810417  | 73025651  | UNC5B      | 72972242  | 72977264  |
| peak:251 | 80947229  | 80947935  | 706   | 80828665  | 81086538  | ZMIZ1      | 80947229  | 80947935  |
| peak:252 | 88716692  | 88717151  | 459   | 88616911  | 88717856  | MMRN2      | 88716692  | 88717151  |
| peak:253 | 91155250  | 91155882  | 632   | 91145059  | 91163314  | IFIT1      | 91155250  | 91155882  |
| peak:254 | 104552485 | 104553797 | 1312  | 104489013 | 104566589 | WBP1L      | 104552485 | 104553797 |
| peak:255 | 104559723 | 104560312 | 589   | 104489013 | 104566589 | WBP1L      | 104559723 | 104560312 |
| peak:256 | 112837909 | 112838721 | 812   | 112780337 | 113390129 | ADRA2A     | 112837909 | 112838721 |
| peak:257 | 116158426 | 116160362 | 1936  | 116034844 | 116208076 | AFAP1L2    | 116158426 | 116160362 |
| peak:258 | 123244575 | 123245599 | 1024  | 122927677 | 123522759 | FGFR2      | 123244575 | 123245599 |
| peak:259 | 130381649 | 130382040 | 391   | 129885908 | 130594961 | MKI67      | 130381649 | 130382040 |
| peak:260 | 2017705   | 2019003   | 1298  | 1993282   | 2018563   | MIR675     | 2017705   | 2018563   |
| peak:260 | 2017705   | 2019003   | 1298  | 2018564   | 2087252   | H19        | 2018564   | 2019003   |
| peak:261 | 2160943   | 2164498   | 3555  | 2156971   | 2176525   | IGF2       | 2160943   | 2164498   |
| peak:262 | 11268043  | 11268592  | 549   | 11127263  | 11509232  | CSNK2A3    | 11268043  | 11268592  |
| peak:263 | 12402647  | 12403252  | 605   | 12353737  | 12557878  | PARVA      | 12402647  | 12403252  |
| peak:264 | 12404587  | 12407120  | 2533  | 12353737  | 12557878  | PARVA      | 12404587  | 12407120  |
| peak:265 | 12410514  | 12411161  | 647   | 12353737  | 12557878  | PARVA      | 12410514  | 12411161  |
| peak:266 | 12414622  | 12416345  | 1723  | 12353737  | 12557878  | PARVA      | 12414622  | 12416345  |
| peak:267 | 12834669  | 12835287  | 618   | 12557879  | 12956175  | TEAD1      | 12834669  | 12835287  |
| peak:268 | 16566539  | 16567254  | 715   | 15797531  | 16694225  | SOX6       | 16566539  | 16567254  |
| peak:269 | 16592793  | 16593551  | 758   | 15797531  | 16694225  | SOX6       | 16592793  | 16593551  |
| peak:270 | 16609429  | 16610177  | 748   | 15797531  | 16694225  | SOX6       | 16609429  | 16610177  |
| peak:271 | 16615703  | 16616149  | 446   | 15797531  | 16694225  | SOX6       | 16615703  | 16616149  |
| peak:272 | 16623340  | 16624503  | 1163  | 15797531  | 16694225  | SOX6       | 16623340  | 16624503  |
| peak:273 | 27433611  | 27434180  | 569   | 27230870  | 27439564  | CCDC34     | 27433611  | 27434180  |
| peak:274 | 44798075  | 44798691  | 616   | 44686559  | 44949858  | TSPAN18    | 44798075  | 44798691  |
| peak:275 | 46377734  | 46378238  | 504   | 46345834  | 46390548  | DGKZ       | 46377734  | 46378238  |
| peak:276 | 48050352  | 48050895  | 543   | 47936084  | 48197802  | PTPRJ      | 48050352  | 48050895  |
| peak:277 | 61534047  | 61535299  | 1252  | 61523999  | 61535107  | DKFZP434K1 | 61534047  | 61535107  |
| peak:277 | 61534047  | 61535299  | 1252  | 61535108  | 61552555  | MYRF       | 61535108  | 61535299  |
| peak:278 | 66486509  | 66487328  | 819   | 66450413  | 66500538  | SPTBN2     | 66486509  | 66487328  |
| peak:279 | 66493674  | 66495379  | 1705  | 66450413  | 66500538  | SPTBN2     | 66493674  | 66495379  |
| peak:280 | 82581850  | 82582560  | 710   | 82528232  | 82612147  | PRCP       | 82581850  | 82582560  |
| peak:281 | 82583067  | 82583651  | 584   | 82528232  | 82612147  | PRCP       | 82583067  | 82583651  |
| peak:282 | 85194858  | 85195323  | 465   | 83195442  | 85338965  | DLG2       | 85194858  | 85195323  |
| peak:283 | 114316541 | 114317397 | 856   | 114290747 | 114355869 | REXO2      | 114316541 | 114317397 |
| peak:284 | 121332485 | 121333650 | 1165  | 121243245 | 121715840 | SORL1      | 121332485 | 121333650 |
| peak:285 | 128361238 | 128362192 | 954   | 127632781 | 128506941 | ETS1       | 128361238 | 128362192 |
| peak:286 | 128600867 | 128601738 | 871   | 128596965 | 128670219 | FLI1       | 128600867 | 128601738 |
| peak:287 | 129984417 | 129985076 | 659   | 129906224 | 130019573 | APLP2      | 129984417 | 129985076 |
| peak:288 | 133953655 | 133955119 | 1464  | 133882735 | 134016623 | JAM3       | 133953655 | 133955119 |
| peak:289 | 133956162 | 133956636 | 474   | 133882735 | 134016623 | JAM3       | 133956162 | 133956636 |

|          |           |           |      |           |           |           |           |           |
|----------|-----------|-----------|------|-----------|-----------|-----------|-----------|-----------|
| peak:290 | 11830639  | 11831672  | 1033 | 11751877  | 12123118  | ETV6      | 11830639  | 11831672  |
| peak:291 | 20704229  | 20704633  | 404  | 20057848  | 20786543  | PDE3A     | 20704229  | 20704633  |
| peak:292 | 33592073  | 33592479  | 406  | 33321268  | 33883985  | SYT10     | 33592073  | 33592479  |
| peak:293 | 34372437  | 34372829  | 392  | 33883986  | 36442886  | ALG10     | 34372437  | 34372829  |
| peak:294 | 47468861  | 47473585  | 4724 | 47346584  | 47473560  | PCED1B    | 47468861  | 47473560  |
| peak:294 | 47468861  | 47473585  | 4724 | 47473561  | 47527664  | AMIGO2    | 47473561  | 47473585  |
| peak:295 | 48578048  | 48580774  | 2726 | 48564372  | 48587220  | CCDC184   | 48578048  | 48580774  |
| peak:296 | 48581132  | 48581632  | 500  | 48564372  | 48587220  | CCDC184   | 48581132  | 48581632  |
| peak:297 | 48740759  | 48744225  | 3466 | 48733719  | 48805738  | ZNF641    | 48740759  | 48744225  |
| peak:298 | 50095140  | 50096362  | 1222 | 50035177  | 50118245  | FMNL3     | 50095140  | 50096362  |
| peak:299 | 51319023  | 51320625  | 1602 | 51277618  | 51333292  | METTL7A   | 51319023  | 51320625  |
| peak:300 | 54411997  | 54412633  | 636  | 54406767  | 54424513  | HOXC6     | 54411997  | 54412633  |
| peak:301 | 54422385  | 54422911  | 526  | 54406767  | 54424513  | HOXC6     | 54422385  | 54422911  |
| peak:302 | 54520010  | 54522014  | 2004 | 54517390  | 54604019  | SMUG1     | 54520010  | 54522014  |
| peak:303 | 54526117  | 54526871  | 754  | 54517390  | 54604019  | SMUG1     | 54526117  | 54526871  |
| peak:304 | 62661805  | 62662398  | 593  | 62654024  | 62757359  | USP15     | 62661805  | 62662398  |
| peak:305 | 76945776  | 76946352  | 576  | 76779548  | 77055721  | OSBPL8    | 76945776  | 76946352  |
| peak:306 | 91497059  | 91498160  | 1101 | 91478837  | 91538952  | LUM       | 91497059  | 91498160  |
| peak:307 | 91566883  | 91567833  | 950  | 91538953  | 92056147  | DCN       | 91566883  | 91567833  |
| peak:308 | 91572618  | 91573569  | 951  | 91538953  | 92056147  | DCN       | 91572618  | 91573569  |
| peak:309 | 95535046  | 95536009  | 963  | 95499430  | 95611381  | FGD6      | 95535046  | 95536009  |
| peak:310 | 95539092  | 95539807  | 715  | 95499430  | 95611381  | FGD6      | 95539092  | 95539807  |
| peak:311 | 96423196  | 96423846  | 650  | 96399548  | 96512752  | LTA4H     | 96423196  | 96423846  |
| peak:312 | 96601230  | 96602388  | 1158 | 96512753  | 96691286  | ELK3      | 96601230  | 96602388  |
| peak:313 | 109227249 | 109229598 | 2349 | 109162144 | 109252033 | SSH1      | 109227249 | 109229598 |
| peak:314 | 111855696 | 111856834 | 1138 | 111825339 | 111890655 | SH2B3     | 111855696 | 111856834 |
| peak:315 | 111860717 | 111861162 | 445  | 111825339 | 111890655 | SH2B3     | 111860717 | 111861162 |
| peak:316 | 116460997 | 116461510 | 513  | 115854215 | 116650725 | MIR620    | 116460997 | 116461510 |
| peak:317 | 116462513 | 116463600 | 1087 | 115854215 | 116650725 | MIR620    | 116462513 | 116463600 |
| peak:318 | 116465234 | 116466269 | 1035 | 115854215 | 116650725 | MIR620    | 116465234 | 116466269 |
| peak:319 | 116466391 | 116469400 | 3009 | 115854215 | 116650725 | MIR620    | 116466391 | 116469400 |
| peak:320 | 116476688 | 116479586 | 2898 | 115854215 | 116650725 | MIR620    | 116476688 | 116479586 |
| peak:321 | 29052854  | 29053736  | 882  | 28815491  | 29151203  | FLT1      | 29052854  | 29053736  |
| peak:322 | 70834842  | 70835388  | 546  | 70681986  | 71135949  | KLHL1     | 70834842  | 70835388  |
| peak:323 | 97886176  | 97888570  | 2394 | 97720348  | 98042885  | MBNL2     | 97886176  | 97888570  |
| peak:324 | 97888978  | 97890385  | 1407 | 97720348  | 98042885  | MBNL2     | 97888978  | 97890385  |
| peak:325 | 113424650 | 113425196 | 546  | 113323001 | 113559702 | ATP11A    | 113424650 | 113425196 |
| peak:326 | 114844483 | 114845177 | 694  | 114716817 | 114949228 | RASA3     | 114844483 | 114845177 |
| peak:327 | 114862352 | 114862769 | 417  | 114716817 | 114949228 | RASA3     | 114862352 | 114862769 |
| peak:328 | 114874693 | 114876466 | 1773 | 114716817 | 114949228 | RASA3     | 114874693 | 114876466 |
| peak:329 | 114878447 | 114879160 | 713  | 114716817 | 114949228 | RASA3     | 114878447 | 114879160 |
| peak:330 | 27858359  | 27859154  | 795  | 27729822  | 28659036  | LINC00645 | 27858359  | 27859154  |
| peak:331 | 52513146  | 52521420  | 8274 | 52496088  | 52635188  | NID2      | 52513146  | 52521420  |
| peak:332 | 64966283  | 64967079  | 796  | 64951386  | 64970628  | ZBTB25    | 64966283  | 64967079  |
| peak:333 | 65194298  | 65196221  | 1923 | 65112010  | 65227024  | PLEKHG3   | 65194298  | 65196221  |
| peak:334 | 75745948  | 75747572  | 1624 | 75694416  | 75753726  | FOS       | 75745948  | 75747572  |
| peak:335 | 75911206  | 75912346  | 1140 | 75827809  | 75943810  | JDP2      | 75911206  | 75912346  |
| peak:336 | 41225335  | 41225921  | 586  | 41204080  | 41233583  | DLL4      | 41225335  | 41225921  |
| peak:337 | 50400402  | 50401262  | 860  | 50040977  | 50442906  | ATP8B4    | 50400402  | 50401262  |
| peak:338 | 53827799  | 53828339  | 540  | 53457630  | 54180088  | WDR72     | 53827799  | 53828339  |

|          |          |          |       |          |          |           |          |          |
|----------|----------|----------|-------|----------|----------|-----------|----------|----------|
| peak:339 | 55255684 | 55256393 | 709   | 55195386 | 55525856 | RSL24D1   | 55255684 | 55256393 |
| peak:340 | 57680561 | 57685031 | 4470  | 57630634 | 57776402 | CGNL1     | 57680561 | 57685031 |
| peak:341 | 60661001 | 60661414 | 413   | 60493304 | 60718084 | ANXA2     | 60661001 | 60661414 |
| peak:342 | 68132224 | 68132783 | 559   | 68022467 | 68229307 | SKOR1     | 68132224 | 68132783 |
| peak:343 | 78361246 | 78361773 | 527   | 78149052 | 78372934 | TBC1D2B   | 78361246 | 78361773 |
| peak:344 | 83939486 | 83940588 | 1102  | 83914419 | 84034779 | BNC1      | 83939486 | 83940588 |
| peak:345 | 23137116 | 23137663 | 547   | 22954865 | 23177315 | USP31     | 23137116 | 23137663 |
| peak:346 | 33962904 | 33963356 | 452   | 33612312 | 34183632 | LINC00273 | 33962904 | 33963356 |
| peak:347 | 65122252 | 65122769 | 517   | 63554842 | 65276815 | CDH11     | 65122252 | 65122769 |
| peak:348 | 65275625 | 65276174 | 549   | 63554842 | 65276815 | CDH11     | 65275625 | 65276174 |
| peak:349 | 65280051 | 65280935 | 884   | 65276816 | 66005364 | LINC00922 | 65280051 | 65280935 |
| peak:350 | 67499011 | 67499644 | 633   | 67479083 | 67516402 | ATP6VOD1  | 67499011 | 67499644 |
| peak:351 | 68706305 | 68706780 | 475   | 68625907 | 68724673 | CDH3      | 68706305 | 68706780 |
| peak:352 | 75489293 | 75490494 | 1201  | 75482851 | 75513755 | TMEM170A  | 75489293 | 75490494 |
| peak:353 | 77465736 | 77467040 | 1304  | 77321978 | 77612700 | ADAMTS18  | 77465736 | 77467040 |
| peak:354 | 84865362 | 84867141 | 1779  | 84793572 | 84949364 | CRISPLD2  | 84865362 | 84867141 |
| peak:355 | 84867188 | 84868387 | 1199  | 84793572 | 84949364 | CRISPLD2  | 84867188 | 84868387 |
| peak:356 | 86537415 | 86539157 | 1742  | 86460876 | 86543299 | FENDRR    | 86537415 | 86539157 |
| peak:357 | 86539384 | 86541739 | 2355  | 86460876 | 86543299 | FENDRR    | 86539384 | 86541739 |
| peak:358 | 86544002 | 86551528 | 7526  | 86543300 | 86566243 | FOXF1     | 86544002 | 86551528 |
| peak:359 | 4411509  | 4412371  | 862   | 4369675  | 4442887  | SPNS2     | 4411509  | 4412371  |
| peak:360 | 4412486  | 4413888  | 1402  | 4369675  | 4442887  | SPNS2     | 4412486  | 4413888  |
| peak:361 | 7611015  | 7611676  | 661   | 7606290  | 7614799  | EFNB3     | 7611015  | 7611676  |
| peak:362 | 15146073 | 15146631 | 558   | 15044653 | 15159553 | MIR4731   | 15146073 | 15146631 |
| peak:363 | 15152152 | 15152660 | 508   | 15044653 | 15159553 | MIR4731   | 15152152 | 15152660 |
| peak:364 | 15154738 | 15155824 | 1086  | 15044653 | 15159553 | MIR4731   | 15154738 | 15155824 |
| peak:365 | 15156973 | 15157873 | 900   | 15044653 | 15159553 | MIR4731   | 15156973 | 15157873 |
| peak:366 | 15161580 | 15163773 | 2193  | 15159554 | 15206801 | PMP22     | 15161580 | 15163773 |
| peak:367 | 20783982 | 20784869 | 887   | 20641246 | 20872902 | CCDC144NL | 20783982 | 20784869 |
| peak:368 | 25850578 | 25851670 | 1092  | 25772034 | 25947557 | KSR1      | 25850578 | 25851670 |
| peak:369 | 28457021 | 28457549 | 528   | 28444138 | 28463722 | MIR3184   | 28457021 | 28457549 |
| peak:370 | 29907826 | 29908340 | 514   | 29902360 | 30044378 | MIR365B   | 29907826 | 29908340 |
| peak:371 | 36610107 | 36610693 | 586   | 36546364 | 36669058 | ARHGAP23  | 36610107 | 36610693 |
| peak:372 | 36613351 | 36614272 | 921   | 36546364 | 36669058 | ARHGAP23  | 36613351 | 36614272 |
| peak:373 | 40513617 | 40514505 | 888   | 40499324 | 40557893 | STAT3     | 40513617 | 40514505 |
| peak:374 | 46641880 | 46654040 | 12160 | 46626315 | 46654090 | HOXB3     | 46641880 | 46654040 |
| peak:375 | 46655944 | 46662212 | 6268  | 46654091 | 46656526 | HOXB4     | 46655944 | 46656526 |
| peak:375 | 46655944 | 46662212 | 6268  | 46656527 | 46658562 | MIR10A    | 46656527 | 46658562 |
| peak:375 | 46655944 | 46662212 | 6268  | 46658563 | 46669367 | HOXB3     | 46658563 | 46662212 |
| peak:376 | 46662319 | 46671164 | 8845  | 46658563 | 46669367 | HOXB3     | 46662319 | 46669367 |
| peak:376 | 46662319 | 46671164 | 8845  | 46669368 | 46676718 | HOXB5     | 46669368 | 46671164 |
| peak:377 | 46671218 | 46685602 | 14384 | 46669368 | 46676718 | HOXB5     | 46671218 | 46676718 |
| peak:377 | 46671218 | 46685602 | 14384 | 46676719 | 46685368 | HOXB6     | 46676719 | 46685368 |
| peak:377 | 46671218 | 46685602 | 14384 | 46685369 | 46690342 | HOXB7     | 46685369 | 46685602 |
| peak:378 | 46698382 | 46701475 | 3093  | 46698069 | 46706878 | HOXB9     | 46698382 | 46701475 |
| peak:379 | 46701835 | 46703183 | 1348  | 46698069 | 46706878 | HOXB9     | 46701835 | 46703183 |
| peak:380 | 48134857 | 48135604 | 747   | 48102965 | 48152720 | ITGA3     | 48134857 | 48135604 |
| peak:381 | 60727017 | 60728343 | 1326  | 60631619 | 60821415 | MRC2      | 60727017 | 60728343 |
| peak:382 | 62610344 | 62610838 | 494   | 62593672 | 62738303 | SMURF2    | 62610344 | 62610838 |
| peak:383 | 72425330 | 72425990 | 660   | 72395657 | 72450873 | GPRC5C    | 72425330 | 72425990 |

|          |          |          |       |          |          |           |          |          |
|----------|----------|----------|-------|----------|----------|-----------|----------|----------|
| peak:384 | 73677273 | 73677974 | 701   | 73663335 | 73690457 | SAP30BP   | 73677273 | 73677974 |
| peak:385 | 78526234 | 78527056 | 822   | 78484515 | 78944438 | RPTOR     | 78526234 | 78527056 |
| peak:386 | 81042045 | 81046708 | 4663  | 81023627 | 81108307 | METRNL    | 81042045 | 81046708 |
| peak:387 | 6730641  | 6740773  | 10132 | 6649955  | 6889670  | ARHGAP28  | 6730641  | 6740773  |
| peak:388 | 6773975  | 6775515  | 1540  | 6649955  | 6889670  | ARHGAP28  | 6773975  | 6775515  |
| peak:389 | 43771278 | 43772276 | 998   | 43719144 | 43830380 | C18orf25  | 43771278 | 43772276 |
| peak:390 | 53058240 | 53058853 | 613   | 52798296 | 53138910 | TCF4      | 53058240 | 53058853 |
| peak:391 | 11207061 | 11208924 | 1863  | 11165648 | 11252584 | LDLR      | 11207061 | 11208924 |
| peak:392 | 17483803 | 17484462 | 659   | 17468232 | 17502260 | PLVAP     | 17483803 | 17484462 |
| peak:393 | 17486542 | 17487410 | 868   | 17468232 | 17502260 | PLVAP     | 17486542 | 17487410 |
| peak:394 | 24183657 | 24183873 | 216   | 24156966 | 24308112 | ZNF254    | 24183657 | 24183873 |
| peak:395 | 31775147 | 31775723 | 576   | 31740487 | 31959642 | TSHZ3     | 31775147 | 31775723 |
| peak:396 | 31808196 | 31809598 | 1402  | 31740487 | 31959642 | TSHZ3     | 31808196 | 31809598 |
| peak:397 | 31841439 | 31843763 | 2324  | 31740487 | 31959642 | TSHZ3     | 31841439 | 31843763 |
| peak:398 | 31845066 | 31845687 | 621   | 31740487 | 31959642 | TSHZ3     | 31845066 | 31845687 |
| peak:399 | 36066328 | 36066921 | 593   | 36042626 | 36079103 | ATP4A     | 36066328 | 36066921 |
| peak:400 | 54376620 | 54378204 | 1584  | 54348635 | 54379124 | MYADM     | 54376620 | 54378204 |
| peak:401 | 55542916 | 55543440 | 524   | 55513672 | 55557464 | GP6       | 55542916 | 55543440 |
| peak:402 | 587634   | 588435   | 801   | 557697   | 612462   | TCF15     | 587634   | 588435   |
| peak:403 | 17614207 | 17615256 | 1049  | 17588903 | 17668624 | RRBP1     | 17614207 | 17615256 |
| peak:404 | 19969145 | 19969984 | 839   | 19956839 | 20015798 | NAA20     | 19969145 | 19969984 |
| peak:405 | 23026698 | 23028411 | 1713  | 23023180 | 23048639 | THBD      | 23026698 | 23028411 |
| peak:406 | 48599528 | 48604817 | 5289  | 48576214 | 48628839 | SNAI1     | 48599528 | 48604817 |
| peak:407 | 49275133 | 49275912 | 779   | 49227875 | 49327998 | FAM65C    | 49275133 | 49275912 |
| peak:408 | 49304551 | 49305860 | 1309  | 49227875 | 49327998 | FAM65C    | 49304551 | 49305860 |
| peak:409 | 50155602 | 50155980 | 378   | 50114387 | 50246706 | NFATC2    | 50155602 | 50155980 |
| peak:410 | 57464269 | 57466116 | 1847  | 57404082 | 57517149 | GNAS      | 57464269 | 57466116 |
| peak:411 | 9826877  | 9827690  | 813   | 9826018  | 9897398  | MIR3687-1 | 9826877  | 9827690  |
| peak:412 | 15910563 | 15911212 | 649   | 15837096 | 16196424 | SAMSN1    | 15910563 | 15911212 |
| peak:413 | 28211847 | 28217731 | 5884  | 28081655 | 28272004 | ADAMTS1   | 28211847 | 28217731 |
| peak:414 | 29466657 | 29467408 | 751   | 29240191 | 29648661 | LINC00314 | 29466657 | 29467408 |
| peak:415 | 33739292 | 33739898 | 606   | 33718237 | 33775032 | URB1      | 33739292 | 33739898 |
| peak:416 | 38626544 | 38627209 | 665   | 38610319 | 38689846 | DSCR3     | 38626544 | 38627209 |
| peak:417 | 39868629 | 39869645 | 1016  | 39709987 | 40078942 | ERG       | 39868629 | 39869645 |
| peak:418 | 44400848 | 44402672 | 1824  | 44354011 | 44456475 | PKNOX1    | 44400848 | 44402672 |
| peak:419 | 46203226 | 46203991 | 765   | 46176624 | 46229897 | UBE2G2    | 46203226 | 46203991 |
| peak:420 | 46700079 | 46700967 | 888   | 46634925 | 46766454 | POFUT2    | 46700079 | 46700967 |
| peak:421 | 47401672 | 47407366 | 5694  | 47358893 | 47469572 | COL6A1    | 47401672 | 47407366 |
| peak:422 | 47516950 | 47517447 | 497   | 47469573 | 47540344 | COL6A2    | 47516950 | 47517447 |
| peak:423 | 47518597 | 47531485 | 12888 | 47469573 | 47540344 | COL6A2    | 47518597 | 47531485 |
| peak:424 | 47531878 | 47535394 | 3516  | 47469573 | 47540344 | COL6A2    | 47531878 | 47535394 |
| peak:425 | 20788478 | 20789449 | 971   | 20770276 | 20821158 | SCARF2    | 20788478 | 20789449 |
| peak:426 | 26952565 | 26953742 | 1177  | 26929864 | 26956329 | MIR548J   | 26952565 | 26953742 |
| peak:427 | 26975135 | 26975847 | 712   | 26956330 | 27000040 | TPST2     | 26975135 | 26975847 |
| peak:428 | 31647411 | 31648425 | 1014  | 31582195 | 31665530 | LIMK2     | 31647411 | 31648425 |
| peak:429 | 31650134 | 31650700 | 566   | 31582195 | 31665530 | LIMK2     | 31650134 | 31650700 |
| peak:430 | 39873686 | 39874512 | 826   | 39824543 | 39889667 | MGAT3     | 39873686 | 39874512 |
| peak:431 | 41208671 | 41209275 | 604   | 41142620 | 41212677 | MIR4766   | 41208671 | 41209275 |
| peak:432 | 50952415 | 50953010 | 595   | 50946391 | 50955339 | NCAPH2    | 50952415 | 50953010 |
| peak:433 | 45656406 | 45657062 | 656   | 45606113 | 45956577 | MIR222    | 45656406 | 45657062 |

|          |           |           |      |           |           |       |           |           |
|----------|-----------|-----------|------|-----------|-----------|-------|-----------|-----------|
| peak:434 | 64927214  | 64928223  | 1009 | 64829907  | 65068474  | MSN   | 64927214  | 64928223  |
| peak:435 | 131169422 | 131170423 | 1001 | 131060959 | 131192913 | STK26 | 131169422 | 131170423 |

.  
peak\_overlap

595  
941  
1943  
1022  
1047  
677  
1045  
613  
830  
604  
759  
1360  
688  
607  
978  
1047  
2428  
1694  
620  
535  
1253  
615  
815  
1902  
1072  
1020  
1342  
523  
1868  
963  
645  
593  
707  
634  
569  
735  
793  
513  
447  
542  
848  
542  
2241  
1512  
1133  
595  
1118



846  
861  
454  
825  
566  
1471  
704  
619  
1675  
2015  
1894  
72  
4966  
1784  
1260  
3373  
396  
843  
2307  
488  
774  
519  
480  
3103  
538  
725  
1034  
573  
702  
906  
607  
1245  
602  
931  
548  
1604  
781  
837  
1089  
635  
1336  
1645  
664  
2031  
820  
1790  
352  
604  
623  
770

504  
1253  
1122  
824  
742  
573  
645  
741  
592  
574  
739  
1380  
787  
624  
853  
846  
1528  
633  
4093  
378  
467  
713  
750  
504  
435  
1285  
1333  
1275  
516  
706  
622  
4104  
581  
851  
348  
1312  
491  
981  
2391  
2035  
805  
1896  
635  
580  
618  
6379  
592  
681  
589  
496

935  
795  
480  
3889  
547  
520  
665  
1752  
963  
527  
764  
1695  
446  
689  
661  
536  
526  
1047  
574  
555  
791  
289  
945  
4232  
2449  
743  
7932  
843  
1221  
2875  
330  
1043  
948  
949  
1050  
615  
516  
444  
664  
236  
340  
5087  
550  
757  
632  
607  
843  
873  
811  
1162

694  
927  
5121  
750  
544  
589  
2779  
537  
680  
1175  
2026  
759  
633  
673  
614  
702  
399  
917  
702  
785  
3126  
820  
2076  
3239  
4100  
2090  
2269  
1779  
1399  
847  
564  
754  
561  
884  
564  
1196  
949  
679  
875  
901  
853  
669  
1703  
506  
1184  
2991  
848  
609  
1566  
1367

790  
694  
513  
1480  
1376  
11282  
383  
1020  
5023  
707  
460  
633  
1313  
590  
813  
1937  
1025  
392  
859  
440  
3556  
550  
606  
2534  
648  
1724  
619  
716  
759  
749  
447  
1164  
570  
617  
505  
544  
1061  
192  
820  
1706  
711  
585  
466  
857  
1166  
955  
872  
660  
1465  
475

1034  
405  
407  
393  
4700  
25  
2727  
501  
3467  
1223  
1603  
637  
527  
2005  
755  
594  
577  
1102  
951  
952  
964  
716  
651  
1159  
2350  
1139  
446  
514  
1088  
1036  
3010  
2899  
883  
547  
2395  
1408  
547  
695  
418  
1774  
714  
796  
8275  
797  
1924  
1625  
1141  
587  
861  
541

710  
4471  
414  
560  
528  
1103  
548  
453  
518  
550  
885  
634  
476  
1202  
1305  
1780  
1200  
1743  
2356  
7527  
863  
1403  
662  
559  
509  
1087  
901  
2194  
888  
1093  
529  
515  
587  
922  
889  
12161  
583  
2036  
3650  
7049  
1797  
5501  
8650  
234  
3094  
1349  
748  
1327  
495  
661

702  
823  
4664  
10133  
1541  
999  
614  
1864  
660  
869  
217  
577  
1403  
2325  
622  
594  
1585  
525  
802  
1050  
840  
1714  
5290  
780  
1310  
379  
1848  
814  
650  
5885  
752  
607  
666  
1017  
1825  
766  
889  
5695  
498  
12889  
3517  
972  
1178  
713  
1015  
567  
827  
605  
596  
657



1010

1002
