# Supplementary material for: Enhanced hemato-endothelial specification during human embryonic differentiation through developmental cooperation between AF4-MLL and MLL-AF4 fusions
Source: PubMed Central journal article supplement — Haematologica. 2019 Jan 24;104(6):1189–201. doi: 10.3324/haematol.2018.202044 (PMC6545840; doi:10.3324/haematol.2018.202044), 2019-06
Supplement: 2018_202044-Disclosures_and_Contributions.pdf [file 2018_202044-Disclosures_and_Contributions.pdf]

Haematologica  
HAEMATOL/2018/202044  
Version 4

Enhanced hemato-endothelial specification during human embryonic differentiation through developmental cooperation between AF4-MLL and MLL-AF4 fusions

Clara Bueno, Fernando J. Calero-Nieto, Xiaonan Wang, Rafael Valdés-Mas, Francisco Gutiérrez-Agüera, Heleia Roca-Ho, Veronica Ayllon, Pedro J. Real, David Arambilet, Lluís Espinosa, Raul Torres-Ruiz, Antonio Agraz-Doblas, Ignacio Varela, Jasper de Boer, Anna Bigas, Bertie Gottgens, Rolf Marschalek, and Pablo Menendez

Disclosures: The authors have nothing to disclose.

Contributions: C.B. conceived the study, designed and performed experiments and analyzed data. P.M. conceived the study, designed experiments, analyzed data and wrote the manuscript. F.C.N., X.W., R.V.M., F.G-A., H.R.H., V.A., P.J.R., D.A., L.E., R-T-R., A.A-D., J.dB. performed experiments and analyzed data. I.V., A.B., B.G., and R.M. contributed intellectually and financially.
